# Supplementary material for: Oxidative C–S bond cleavage reaction of DMSO for C–N and C–C bond formation: new Mannich-type reaction for β-amino ketones
Source: Royal Society of Chemistry journal article supplement (doi:10.1039/c4ra14249g), 2014-11-26

## Supporting Information

### **Oxidative C–S Bond Cleavage Reaction of DMSO for C–N and C–C Bond Formation: New Mannich-type Reaction for $\beta$ -amino Ketones**

Kai Sun,\* Yunhe Lv, Zhonghong Zhu, Liping Zhang, Hankui Wu, Lin Liu, Yongqing Jiang,

Beibei Xiao and Xin Wang\*

College of Chemistry and Chemical Engineering, Anyang Normal University

Anyang 455000, China.

E-mail: sunk468@nenu.edu.cn

wangx933@126.com

#### Table of Contents

|                                                                                                                          |              |
|--------------------------------------------------------------------------------------------------------------------------|--------------|
| <b>I. General remarks .....</b>                                                                                          | <b>1</b>     |
| <b>II. Optimization study for ruthenium catalyzed mannich reaction.....</b>                                              | <b>1</b>     |
| <b>III. The KIE for reactions between 1d and saccharin.....</b>                                                          | <b>2</b>     |
| <b>IV. General procedure for the preparation of 2 and 4.....</b>                                                         | <b>3</b>     |
| <b>V. Analytical data of products obtained in this study.....</b>                                                        | <b>3-11</b>  |
| <b>VI. <math>^1\text{H}</math> NMR and <math>^{13}\text{C}</math> NMR spectra copies of compounds 2, 4, C and H.....</b> | <b>12-44</b> |

## I. General Remarks:

Unless otherwise stated, all commercial reagents and solvents were used without additional purification. All the reactions were carried out under air atmosphere.  $^1\text{H}$  NMR spectra were recorded at 25 °C on a Bruker Ascend<sup>TM</sup> 400 spectrometer (Germany),  $^{13}\text{C}$  NMR spectra were recorded at 25 °C on a Bruker 100 MHz, and TMS as internal standard. Melting points were obtained with a micro melting point XT4A Beijing Keyi electrooptic apparatus and are uncorrected. HRMS data were obtained on a Waters LCT Premierxe<sup>TM</sup> (USA). All reactions were monitored by TLC with Taizhou GF254 silica gel coated plates. Flash column chromatography was carried out using 300-400 mesh silica gel at increased pressure.

## II. Optimization Study for Ruthenium catalyzed mannich reaction

**Table 1:** Screening of Reaction Conditions <sup>[a, b]</sup>

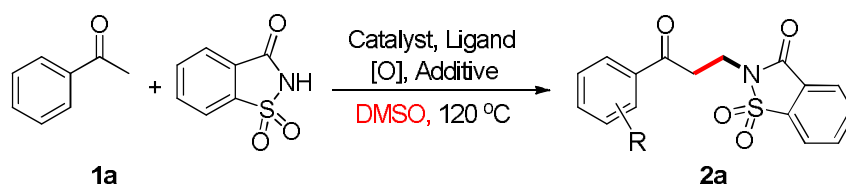

| Entry | Catalyst             | Ligand                   | Oxidant                                      | Additive                        | Yield |
|-------|----------------------|--------------------------|----------------------------------------------|---------------------------------|-------|
| 1     | Cu(OTf) <sub>2</sub> | 1,10-phen <sup>[c]</sup> | selectflour                                  | Na <sub>2</sub> CO <sub>3</sub> | 41    |
| 2     | Cu(OTf) <sub>2</sub> | 2,2-bipyl <sup>[d]</sup> | selectflour                                  | Na <sub>2</sub> CO <sub>3</sub> | 38    |
| 3     | Cu(OTf) <sub>2</sub> | No                       | selectflour                                  | Na <sub>2</sub> CO <sub>3</sub> | 30    |
| 4     | Cu(OAc) <sub>2</sub> | 1,10-phen                | selectflour                                  | Na <sub>2</sub> CO <sub>3</sub> | 46    |
| 5     | CuSO <sub>4</sub>    | 1,10-phen                | selectflour                                  | Na <sub>2</sub> CO <sub>3</sub> | 27    |
| 6     | CuCl                 | 1,10-phen                | selectflour                                  | Na <sub>2</sub> CO <sub>3</sub> | 24    |
| 7     | Pd(OAc) <sub>2</sub> | 1,10-phen                | selectflour                                  | Na <sub>2</sub> CO <sub>3</sub> | 33    |
| 8     | FeCl <sub>3</sub>    | 1,10-phen                | selectflour                                  | Na <sub>2</sub> CO <sub>3</sub> | 57    |
| 9     | FeCl <sub>2</sub>    | 1,10-phen                | selectflour                                  | Na <sub>2</sub> CO <sub>3</sub> | 39    |
| 10    | AgNO <sub>3</sub>    | 1,10-phen                | selectflour                                  | Na <sub>2</sub> CO <sub>3</sub> | 46    |
| 11    | RuCl <sub>3</sub>    | 1,10-phen                | selectflour                                  | Na <sub>2</sub> CO <sub>3</sub> | 91    |
| 12    | RuCl <sub>3</sub>    | 1,10-phen                | NFSI                                         | Na <sub>2</sub> CO <sub>3</sub> | 0     |
| 13    | RuCl <sub>3</sub>    | 1,10-phen                | TBHP                                         | Na <sub>2</sub> CO <sub>3</sub> | 0     |
| 14    | RuCl <sub>3</sub>    | 1,10-phen                | K <sub>2</sub> S <sub>2</sub> O <sub>8</sub> | Na <sub>2</sub> CO <sub>3</sub> | 0     |
| 15    | RuCl <sub>3</sub>    | 1,10-phen                | O <sub>2</sub>                               | Na <sub>2</sub> CO <sub>3</sub> | 0     |
| 16    | RuCl <sub>3</sub>    | 1,10-phen                | selectflour                                  | CH <sub>3</sub> COOH            | 86    |

[a] Reaction conditions: **1a** (0.5 mmol), saccharin (1.0 mmol), RuCl<sub>3</sub> (5 mol%), 1,10-phen (0.025 mmol), selectflour (1.0 mmol), Na<sub>2</sub>CO<sub>3</sub> (1.0 mmol) and DMSO (2 mL) at 120 °C for 3 h. [b] Yield of the isolated products.

[c] 1,10-phen = 1,10-phenanthroline. [d] 2,2-bipyl = 2,2-bipyridine.

### III. The KIE for reactions between **1d** and saccharin.

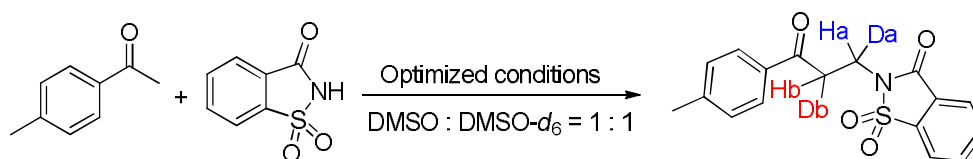

To a solution of 1-(*p*-tolyl)ethanone (**1d**) (67.0 mg, 0.5 mmol) in DMSO (1.0 mL) and DMSO- $d_6$  (1.0 mL) was added RuCl<sub>3</sub> (4.3 mg, 0.025 mmol), 1,10-phen (4.95 mg, 0.025 mmol), selectflour (354 mg, 1.0 mmol), Na<sub>2</sub>CO<sub>3</sub> (108 mg, 1.0 mmol) and saccharin (183.2 mg, 1.0 mmol). The mixture was stirred at 120 °C for 0.5 h (monitored by TLC), quenched with water, extracted with dichloromethane (5×3 mL), and dried over anhydrous Na<sub>2</sub>SO<sub>4</sub>. The solvent was removed under reduced pressure, and the residue was purified by flash column chromatography. The KIE value was determined by average of two runs and representative <sup>1</sup>HNMR spectrum was provided as follows:

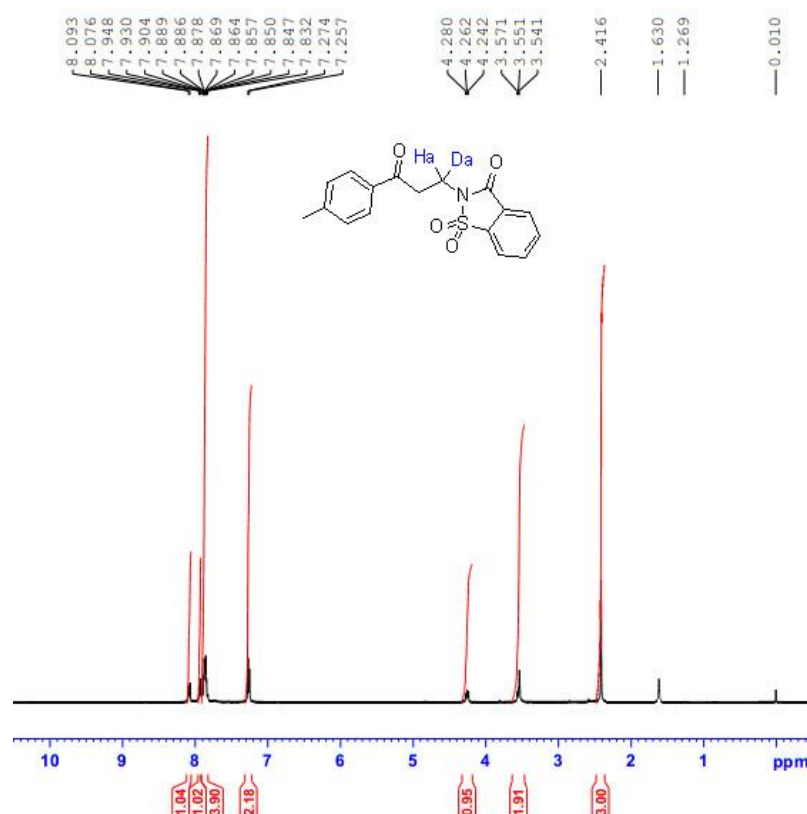

To a solution of 1-(*p*-tolyl)ethanone (**1d**) (67.0 mg, 0.5 mmol) in DMSO (1.0 mL) and DMSO- $d_6$  (1.0 mL) was added RuCl<sub>3</sub> (4.3 mg, 0.025 mmol), 1,10-phen (4.95 mg, 0.025 mmol), selectflour (354 mg, 1.0 mmol), Na<sub>2</sub>CO<sub>3</sub> (108 mg, 1.0 mmol) and saccharin (183.2 mg, 1.0 mmol). The mixture was stirred at 120 °C for 3.0 h (monitored by TLC), quenched with water, extracted with dichloromethane (5×3 mL), and dried over anhydrous Na<sub>2</sub>SO<sub>4</sub>. The solvent was removed under reduced pressure, and the residue was purified by flash column chromatography. The KIE value was determined by average of two runs and representative <sup>1</sup>HNMR spectrum was provided as follows:

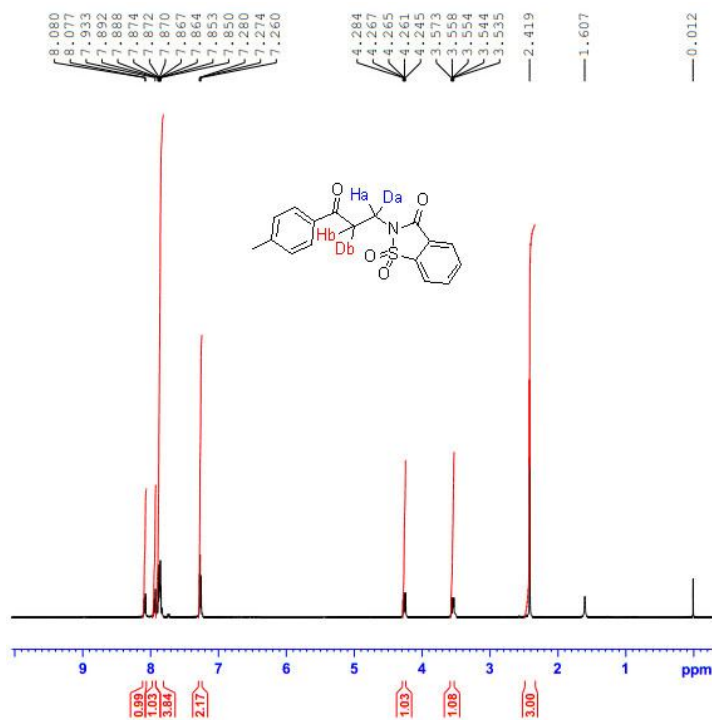

#### IV. General procedure for the preparation of 2 and 4 (2a as an example).

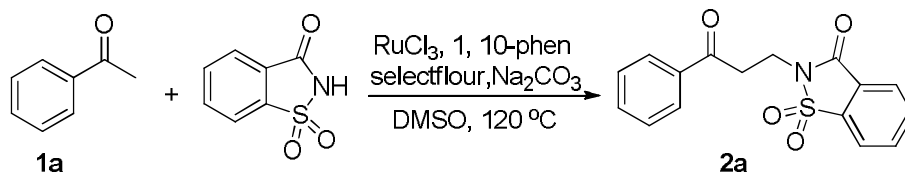

To a solution of acetophenone (**1a**) (60.1 mg, 0.5 mmol) in DMSO (2.0 mL) was added RuCl<sub>3</sub> (4.3 mg, 0.025 mmol), 1,10-phen (4.95 mg, 0.025 mmol), selectfluor (354 mg, 1.0 mmol) and Na<sub>2</sub>CO<sub>3</sub> (108 mg, 1.0 mmol). The mixture was stirred at 120 °C for 3.0 h (monitored by TLC), quenched with water, extracted with dichloromethane (5 × 3 mL), and dried over anhydrous Na<sub>2</sub>SO<sub>4</sub>. The solvent was removed under reduced pressure, and the residue was purified by a shot flash silica gel column chromatography (EtOAc/petro ether=1:6) to give compound **2a** as a white solid (143.3 mg, 91%).

#### V. Analytical data of products obtained in this study

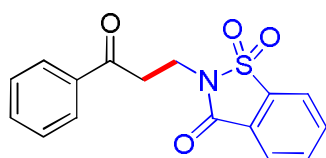

##### 2-(3-oxo-3-phenylpropyl)benzo[d]isothiazol-3(2H)-one 1,1-dioxide **2a**

White solid. Mp: 138-140 °C; <sup>1</sup>H NMR (400 MHz; CDCl<sub>3</sub>): δ = 3.59 (t, *J* = 7.6 Hz, 2H), 4.28 (t, *J* = 7.6 Hz, 2H), 7.48 (t, *J* = 7.6 Hz, 2H), 7.58 (d, *J* = 7.2 Hz, 1H), 7.86 (d, *J* = 8.6 Hz, 2H), 7.89-7.95 (m, 3H), 7.98 (dd, *J*<sub>1</sub> = 2.8 Hz, *J*<sub>2</sub> = 6.8 Hz, 1H). <sup>13</sup>C NMR (100 MHz; CDCl<sub>3</sub>): δ = 34.5, 36.8, 121.0, 125.2, 127.4, 128.1, 128.7, 133.5, 134.4, 134.8, 136.2, 137.8, 158.8, 196.8. HRMS

(ESI-TOF) Calcd for C<sub>16</sub>H<sub>14</sub>NO<sub>4</sub>S, [M+H]<sup>+</sup> 316.0644; Found 316.0641.

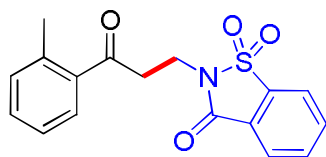

**2-(3-oxo-3-(*o*-tolyl)propyl)benzo[*d*]isothiazol-3(2*H*)-one 1,1-dioxide 2b**

White solid. Mp: 134-135 °C; <sup>1</sup>H NMR (400 MHz; CDCl<sub>3</sub>): δ = 2.56 (s, 3H), 3.52 (t, *J* = 7.6 Hz, 2H), 4.25 (t, *J* = 7.6 Hz, 2H), 7.26 (d, *J* = 8.0 Hz, 2H), 7.41 (d, *J* = 7.2 Hz, 1H), 7.70 (d, *J* = 8.6 Hz, 1H), 7.88 (dd, *J*<sub>1</sub> = 2.4 Hz, *J*<sub>2</sub> = 7.6 Hz, 2H), 7.94 (d, *J* = 7.2 Hz, 1H), 8.09 (d, *J* = 7.2 Hz, 1H). <sup>13</sup>C NMR (100 MHz; CDCl<sub>3</sub>): δ = 21.5, 34.6, 39.2, 121.0, 125.2, 125.8, 127.4, 128.9, 131.9, 132.2, 134.4, 134.8, 137.8, 138.9, 158.8, 200.0. HRMS (ESI-TOF) Calcd for C<sub>17</sub>H<sub>16</sub>NO<sub>4</sub>S, [M+H]<sup>+</sup> 330.0794; Found 330.0797.

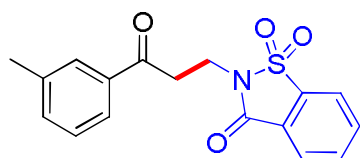

**2-(3-oxo-3-(*m*-tolyl)propyl)benzo[*d*]isothiazol-3(2*H*)-one 1,1-dioxide 2c**

White solid. Mp: 106-107 °C; <sup>1</sup>H NMR (400 MHz; CDCl<sub>3</sub>): δ = 2.41 (s, 3H), 3.56 (t, *J* = 7.6 Hz, 2H), 4.26 (t, *J* = 7.6 Hz, 2H), 7.35 (t, *J* = 8.0 Hz, 1H), 7.50 (d, *J* = 7.6 Hz, 1H), 7.76 (d, *J* = 9.2 Hz, 2H), 7.85-7.90 (m, 2H), 7.91-8.09 (m, 2H). <sup>13</sup>C NMR (100 MHz; CDCl<sub>3</sub>): δ = 21.3, 34.5, 36.9, 121.0, 125.2, 125.3, 127.4, 128.6, 134.3, 134.4, 134.8, 136.2, 137.7, 138.5, 158.8, 197.0. HRMS (ESI-TOF) Calcd for C<sub>17</sub>H<sub>16</sub>NO<sub>4</sub>S, [M+H]<sup>+</sup> 330.0794; Found 330.0784.

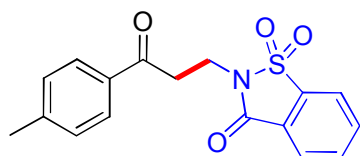

**2-(3-oxo-3-(*p*-tolyl)propyl)benzo[*d*]isothiazol-3(2*H*)-one 1,1-dioxide 2d**

White solid. Mp: 132-133 °C; <sup>1</sup>H NMR (400 MHz; CDCl<sub>3</sub>): δ = 2.42(s, 3H), 3.55 (dd, *J*<sub>1</sub> = 1.2 Hz, *J*<sub>2</sub> = 8.0 Hz, 2H), 4.25 (dd, *J*<sub>1</sub> = 1.2 Hz, *J*<sub>2</sub> = 7.6 Hz, 2H), 7.26 (d, *J* = 6.8 Hz, 2H), 7.85-7.91 (m, 4H), 8.08 (d, *J* = 8.0 Hz, 1H). <sup>13</sup>C NMR (100 MHz; CDCl<sub>3</sub>): δ = 21.7, 34.6, 36.7, 121.0, 125.2, 127.4, 128.2, 129.4, 133.8, 134.4, 134.8, 137.8, 144.4, 158.8, 196.4. HRMS (ESI-TOF) Calcd for C<sub>17</sub>H<sub>16</sub>NO<sub>4</sub>S, [M+H]<sup>+</sup> 330.0794; Found 330.0793.

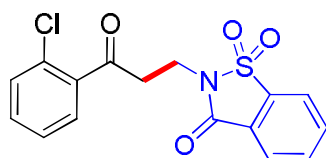

**2-(3-(2-chlorophenyl)-3-oxopropyl)benzo[*d*]isothiazol-3(2*H*)-one 1,1-dioxide 2e**

White solid. Mp: 132-134 °C; <sup>1</sup>H NMR (400 MHz; CDCl<sub>3</sub>): δ = 3.58 (t, *J* = 7.5 Hz, 2H), 4.25 (t, *J* = 7.5 Hz, 2H), 7.33 (dd, *J*<sub>1</sub> = 2.4 Hz, *J*<sub>2</sub> = 6.4 Hz, 1H), 7.35-7.59 (m, 2H), 7.60 (d, *J* = 6.8 Hz, 1H), 7.85-8.08 (m, 3H), 8.09(d, *J* = 6.0 Hz, 1H). <sup>13</sup>C NMR (100 MHz; CDCl<sub>3</sub>): δ = 34.2, 41.0, 121.0,

125.2, 127.0, 127.3, 129.6, 130.8, 131.4, 132.3, 134.4, 134.8, 137.7, 138.0, 158.7, 199.2. HRMS (ESI-TOF) Calcd for C<sub>16</sub>H<sub>13</sub>ClNO<sub>4</sub>S, [M+H]<sup>+</sup> 350.0251; Found 350.0253.

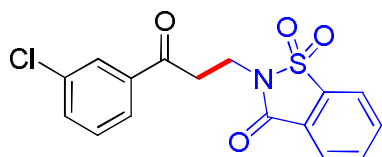

**2-(3-(3-chlorophenyl)-3-oxopropyl)benzo[d]isothiazol-3(2H)-one 1,1-dioxide 2f**

White solid. Mp: 105-106 °C; <sup>1</sup>H NMR (400 MHz; CDCl<sub>3</sub>): δ = 3.56 (t, *J* = 8.0 Hz, 2H), 4.27 (t, *J* = 8.0 Hz, 2H), 7.29 (t, *J* = 8.0 Hz, 1H), 7.55-7.58 (m, 1H), 7.84-7.88 (m, 3H), 7.90-7.95 (m, 2H), 8.08 (s, 1H). <sup>13</sup>C NMR (100 MHz; CDCl<sub>3</sub>): δ = 34.3, 36.9, 121.0, 125.2, 126.1, 127.3, 128.2, 130.1, 133.5, 134.4, 134.9, 135.1, 137.7, 158.8, 195.5. HRMS (ESI-TOF) Calcd for C<sub>16</sub>H<sub>13</sub>ClNO<sub>4</sub>S, [M+H]<sup>+</sup> 350.0251; Found 350.0247.

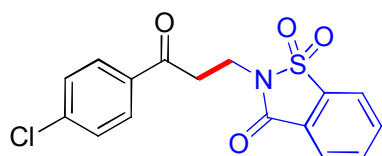

**2-(3-(4-chlorophenyl)-3-oxopropyl)benzo[d]isothiazol-3(2H)-one 1,1-dioxide 2g**

White solid. Mp: 153-154 °C; <sup>1</sup>H NMR (400 MHz; CDCl<sub>3</sub>): δ = 3.54 (t, *J* = 8.0 Hz, 2H), 4.26 (t, *J* = 8.0 Hz, 2H), 7.46 (dd, *J*<sub>1</sub> = 2.0 Hz, *J*<sub>2</sub> = 6.8 Hz, 2H), 7.86-8.08 (m, 5H), 8.09 (d, *J* = 6.8 Hz, 1H). <sup>13</sup>C NMR (100 MHz; CDCl<sub>3</sub>): δ = 34.3, 36.8, 120.9, 125.2, 127.3, 129.1, 129.5, 134.4, 134.5, 134.9, 137.7, 140.1, 195.6. HRMS (ESI-TOF) Calcd for C<sub>16</sub>H<sub>13</sub>ClNO<sub>4</sub>S, [M+H]<sup>+</sup> 350.0251; Found 350.0254.

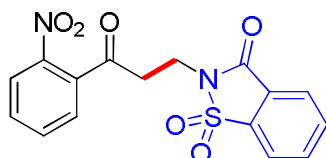

**2-(3-(2-nitrophenyl)-3-oxopropyl)benzo[d]isothiazol-3(2H)-one 1,1-dioxide 2h**

White solid. Mp: 131-132 °C; <sup>1</sup>H NMR (400 MHz; CDCl<sub>3</sub>): δ = 3.39 (t, *J* = 7.6 Hz, 2H), 4.32 (t, *J* = 7.6 Hz, 2H), 7.48 (dd, *J*<sub>1</sub> = 1.2 Hz, *J*<sub>2</sub> = 7.6 Hz, 1H), 7.61-7.65 (m, 1H), 7.75 (dd, *J*<sub>1</sub> = 1.2 Hz, *J*<sub>2</sub> = 7.6 Hz, 1H), 7.83-8.07 (m, 3H), 8.08 (d, *J* = 7.5 Hz, 1H), 8.14 (d, *J* = 8.0 Hz, 1H). <sup>13</sup>C NMR (100 MHz; CDCl<sub>3</sub>): δ = 34.0, 40.9, 121.0, 124.5, 125.3, 125.4, 127.3, 127.5, 130.9, 134.4, 134.5, 134.9, 137.0, 137.7, 158.7, 198.8. HRMS (ESI-TOF) Calcd for C<sub>16</sub>H<sub>13</sub>N<sub>2</sub>O<sub>6</sub>S, [M+H]<sup>+</sup> 361.0486; Found 361.0483.

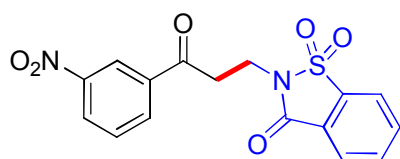

**2-(3-(3-nitrophenyl)-3-oxopropyl)benzo[d]isothiazol-3(2H)-one 1,1-dioxide 2i**

White solid. Mp: 89-91 °C; <sup>1</sup>H NMR (400 MHz; CDCl<sub>3</sub>): δ = 3.64 (t, *J* = 6.8 Hz, 2H), 4.31 (t, *J* = 6.8 Hz, 2H), 7.10 (d, *J* = 8.0 Hz, 1H), 7.81-7.96 (m, 3H), 8.10 (d, *J* = 8.0 Hz, 1H), 8.30 (d, *J* = 7.6

Hz, 1H), 8.46 (dd,  $J_1 = 2.0$  Hz,  $J_2 = 8.0$  Hz, 1H), 8.79 (s, 1H).  $^{13}\text{C}$  NMR (100 MHz;  $\text{CDCl}_3$ ):  $\delta = 34.0, 37.1, 121.0, 122.9, 125.3, 127.2, 127.8, 130.0, 133.5, 134.5, 134.9, 137.4, 148.5, 158.8, 194.7$ . HRMS (ESI-TOF) Calcd for  $\text{C}_{16}\text{H}_{13}\text{N}_2\text{O}_6\text{S}$ ,  $[\text{M}+\text{H}]^+$  361.0486; Found 361.0481.

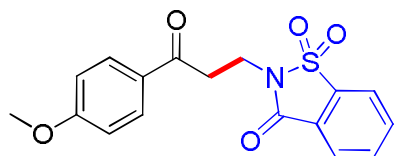

**2-(3-(4-methoxyphenyl)-3-oxopropyl)benzo[d]isothiazol-3(2H)-one 1,1-dioxide 2j**

White solid. Mp: 127-128 °C;  $^1\text{H}$  NMR (400 MHz;  $\text{CDCl}_3$ ):  $\delta = 3.52$  (t,  $J = 7.6$  Hz, 2H), 3.88 (s, 3H), 4.26 (t,  $J = 7.6$  Hz, 2H), 6.94 (d,  $J = 8.8$  Hz, 2H), 7.85-7.96 (m, 5H), 8.08 (d,  $J = 7.2$  Hz, 1H).  $^{13}\text{C}$  NMR (100 MHz;  $\text{CDCl}_3$ ):  $\delta = 34.6, 36.4, 55.5, 113.8, 121.0, 125.2, 127.3, 129.3, 130.3, 134.4, 134.8, 137.7, 158.8, 163.8, 196.3$ . HRMS (ESI-TOF) Calcd for  $\text{C}_{17}\text{H}_{16}\text{NO}_5\text{S}$ ,  $[\text{M}+\text{H}]^+$  346.0741; Found 346.0748.

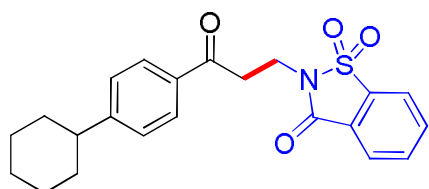

**2-(3-(4-cyclohexylphenyl)-3-oxopropyl)benzo[d]isothiazol-3(2H)-one 1,1-dioxide 2k**

White solid. Mp: 153-154 °C;  $^1\text{H}$  NMR (400 MHz;  $\text{CDCl}_3$ ):  $\delta = 1.28$ -1.45 (m, 5H), 1.59-1.88 (m, 5H), 2.56 (q,  $J = 4.4$  Hz, 1H), 3.55 (t,  $J = 7.6$  Hz, 2H), 4.26 (t,  $J = 7.6$  Hz, 2H), 7.30 (d,  $J = 8.4$  Hz, 2H), 7.85-7.95 (m, 5H), 8.09 (d,  $J = 7.2$  Hz, 1H).  $^{13}\text{C}$  NMR (100 MHz;  $\text{CDCl}_3$ ):  $\delta = 26.0, 26.7, 34.1, 34.6, 36.7, 44.7, 121.0, 125.2, 127.2, 127.4, 128.3, 134.1, 134.4, 134.8, 137.8, 154.2, 158.8, 196.4$ . HRMS (ESI-TOF) Calcd for  $\text{C}_{22}\text{H}_{24}\text{NO}_4\text{S}$ ,  $[\text{M}+\text{H}]^+$  398.1418; Found 398.1413.

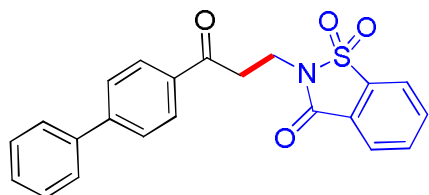

**2-(3-(1,1'-biphenyl-4-yl)-3-oxopropyl)benzo[d]isothiazol-3(2H)-one 1,1-dioxide 2l**

White solid. Mp: 151-152 °C;  $^1\text{H}$  NMR (400 MHz;  $\text{CDCl}_3$ ):  $\delta = 3.62$  (t,  $J = 7.6$  Hz, 2H), 4.30 (t,  $J = 7.6$  Hz, 2H), 7.41-7.63 (m, 3H), 7.65 (d,  $J = 6.4$  Hz, 2H), 7.70 (d,  $J = 8.4$  Hz, 2H), 7.86-7.89 (m, 3H), 7.90-8.11 (m, 3H).  $^{13}\text{C}$  NMR (100 MHz;  $\text{CDCl}_3$ ):  $\delta = 34.5, 36.9, 121.0, 125.2, 127.3, 127.4, 128.3, 128.7, 129.0, 134.4, 134.8, 134.9, 137.7, 139.8, 146.2, 158.8, 196.4$ . HRMS (ESI-TOF) Calcd for  $\text{C}_{22}\text{H}_{18}\text{NO}_4\text{S}$ ,  $[\text{M}+\text{H}]^+$  392.0968; Found 392.0966.

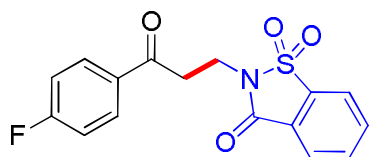

**2-(3-(4-fluorophenyl)-3-oxopropyl)benzo[d]isothiazol-3(2H)-one 1,1-dioxide 2m**

White solid. Mp: 150-151 °C; <sup>1</sup>H NMR (400 MHz; CDCl<sub>3</sub>): δ = 3.55 (t, *J* = 7.6 Hz, 2H), 4.28 (t, *J* = 7.6 Hz, 2H), 7.15 (dd, *J*<sub>1</sub> = 2.4 Hz, *J*<sub>2</sub> = 8.4 Hz, 2H), 7.86-7.93 (m, 3H), 7.94-8.02 (m, 2H), 8.07 (dd, *J*<sub>1</sub> = 1.6 Hz, *J*<sub>2</sub> = 6.8 Hz, 1H). <sup>13</sup>C NMR (100 MHz; CDCl<sub>3</sub>): δ = 34.4, 36.7, 115.7, 116.0, 121.0, 125.2, 127.3, 130.7, 130.8, 132.7, 134.4, 134.9, 137.7, 158.8, 164.7, 167.3, 195.2. HRMS (ESI-TOF) Calcd for C<sub>16</sub>H<sub>13</sub>FNO<sub>4</sub>S, [M+H]<sup>+</sup> 334.0549; Found 334.0546.

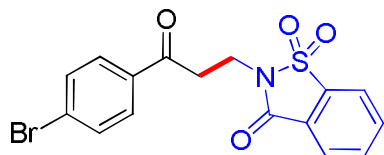

**2-(3-(4-bromophenyl)-3-oxopropyl)benzo[d]isothiazol-3(2H)-one 1,1-dioxide 2n**

White solid. Mp: 179-180 °C; <sup>1</sup>H NMR (400 MHz; CDCl<sub>3</sub>): δ = 3.59 (t, *J* = 8.0 Hz, 2H), 4.29 (t, *J* = 7.6 Hz, 2H), 7.73 (d, *J* = 8.4 Hz, 2H), 7.83-7.87 (m, 2H), 7.88-7.91 (m, 1H), 7.93-8.08 (m, 3H). <sup>13</sup>C NMR (100 MHz; CDCl<sub>3</sub>): δ = 34.2, 37.1, 121.0, 121.1, 125.3, 125.4, 125.7, 125.8, 127.2, 128.4, 134.3, 134.5, 134.9, 135.2, 137.6, 138.8, 158.8, 195.9. HRMS (ESI-TOF) Calcd for C<sub>16</sub>H<sub>13</sub>BrNO<sub>4</sub>S, [M+H]<sup>+</sup> 393.9749; Found 393.9747.

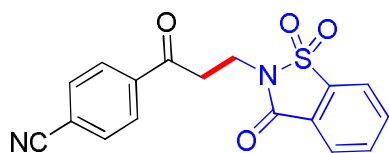

**4-(3-(1,1-dioxido-3-oxobenzo[d]isothiazol-2(3H)-yl)propanoyl)benzonitrile 2o**

White solid. Mp: 177-178 °C; <sup>1</sup>H NMR (400 MHz; CDCl<sub>3</sub>): δ = 3.59 (t, *J* = 7.2 Hz, 2H), 4.28 (s, 2H), 7.79 (d, *J* = 8.4 Hz, 2H), 7.89-7.94 (m, 3H), 8.05-8.11 (m, 3H). <sup>13</sup>C NMR (100 MHz; CDCl<sub>3</sub>): δ = 34.1, 37.1, 116.9, 117.8, 121.0, 125.3, 127.2, 128.5, 129.9, 132.2, 134.5, 134.9, 137.7, 139.1, 158.8, 195.5. HRMS (ESI-TOF) Calcd for C<sub>17</sub>H<sub>13</sub>N<sub>2</sub>O<sub>4</sub>S, [M+H]<sup>+</sup> 341.0591; Found 341.0596.

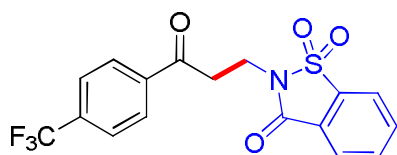

**2-(3-oxo-3-(4-(trifluoromethyl)phenyl)propyl)benzo[d]isothiazol-3(2H)-one 1,1-dioxide 2p**

White solid. Mp: 123-124 °C; <sup>1</sup>H NMR (400 MHz; CDCl<sub>3</sub>): δ = 3.59 (t, *J* = 7.6 Hz, 2H), 4.28 (t, *J* = 7.6 Hz, 2H), 7.73 (d, *J* = 8.4 Hz, 2H), 7.85 (dd, *J*<sub>1</sub> = 1.2 Hz, *J*<sub>2</sub> = 7.6 Hz, 2H), 7.87-7.91 (m, 1H), 7.93-8.08 (m, 3H). <sup>13</sup>C NMR (100 MHz; CDCl<sub>3</sub>): δ = 34.2, 37.1, 121.0, 121.1, 125.3, 125.4, 125.7, 125.8, 127.2, 128.4, 134.3, 134.5, 134.9, 135.2, 137.6, 138.8, 158.8, 159.9. HRMS (ESI-TOF) Calcd for C<sub>17</sub>H<sub>13</sub>F<sub>3</sub>NO<sub>4</sub>S, [M+H]<sup>+</sup> 384.0517; Found 384.0516.

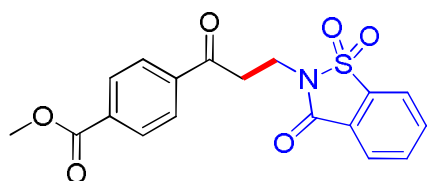

**methyl 4-(3-(1,1-dioxido-3-oxobenzo[d]isothiazol-2(3H)-yl)propanoyl)benzoate 2q**



White solid. Mp: 132-133 °C; <sup>1</sup>H NMR (400 MHz; CDCl<sub>3</sub>): δ = 3.60 (t, *J* = 8.0 Hz, 2H), 3.95 (s, 3H), 4.27 (t, *J* = 8.0 Hz, 2H), 7.85-8.91 (m, 3H), 7.94 (d, *J* = 7.2 Hz, 2H), 8.01 (d, *J* = 8.4 Hz, 1H), 8.07-8.13 (m, 2H). <sup>13</sup>C NMR (100 MHz; CDCl<sub>3</sub>): δ = 34.3, 37.2, 52.5, 121.1, 125.2, 127.3, 127.9, 129.9, 134.2, 134.3, 134.5, 137.7, 139.3, 158.8, 166.1, 196.4. HRMS (ESI-TOF) Calcd for C<sub>18</sub>H<sub>16</sub>NO<sub>6</sub>S, [M+H]<sup>+</sup> 374.0696; Found 374.0693.

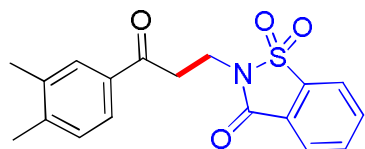

**2-(3-(3,4-dimethylphenyl)-3-oxopropyl)benzo[d]isothiazol-3(2H)-one 1,1-dioxide 2r**

White solid. Mp: 126-128 °C; <sup>1</sup>H NMR (400 MHz; CDCl<sub>3</sub>): δ = 2.31 (s, 3H), 2.32 (s, 3H), 3.55 (dd, *J*<sub>1</sub> = 1.2 Hz, *J*<sub>2</sub> = 8.0 Hz, 2H), 4.25 (q, *J* = 6.4 Hz, 2H), 7.22 (d, *J* = 8.0 Hz, 1H), 7.69 (d, *J* = 6.4 Hz, 1H), 7.74 (s, 1H), 7.83-7.89 (m, 3H), 7.91 (d, *J* = 6.4 Hz, 1H). <sup>13</sup>C NMR (100 MHz; CDCl<sub>3</sub>): δ = 19.7, 20.2, 34.6, 36.7, 120.9, 125.2, 125.8, 127.4, 129.2, 134.2, 134.3, 137.0, 137.8, 143.1, 158.8, 196.7. HRMS (ESI-TOF) Calcd for C<sub>18</sub>H<sub>18</sub>NO<sub>4</sub>S, [M+H]<sup>+</sup> 344.0951; Found 344.0953.

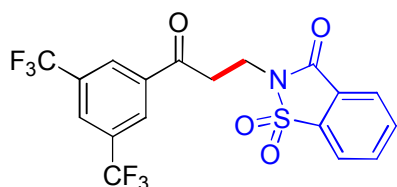

**2-(3-(3,5-bis(trifluoromethyl)phenyl)-3-oxopropyl)benzo[d]isothiazol-3(2H)-one 1,1-dioxide 2s**

White solid. Mp: 129-130 °C; <sup>1</sup>H NMR (400 MHz; CDCl<sub>3</sub>): δ = 3.63 (t, *J* = 7.6 Hz, 2H), 4.31 (t, *J* = 7.6 Hz, 2H), 7.87-7.97 (m, 3H), 8.10 (t, *J* = 6.8 Hz, 2H), 8.37 (s, 2H). <sup>13</sup>C NMR (100 MHz; CDCl<sub>3</sub>): δ = 33.9, 37.1, 121.0, 121.4, 124.1, 125.3, 126.7, 127.2, 128.1, 132.1, 132.4, 132.7, 133.1, 134.5, 134.9, 137.6, 137.7, 158.8, 194.1. HRMS (ESI-TOF) Calcd for C<sub>18</sub>H<sub>12</sub>F<sub>6</sub>NO<sub>4</sub>S, [M+H]<sup>+</sup> 452.0383; Found 452.0382.

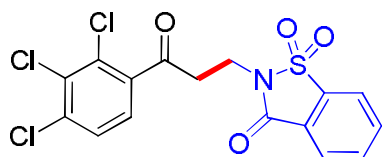

**2-(3-(2,3,4-trichlorophenyl)-3-oxopropyl)benzo[d]isothiazol-3(2H)-one 1,1-dioxide 2t**

White solid. Mp: 142-143 °C; <sup>1</sup>H NMR (400 MHz; CDCl<sub>3</sub>): δ = 3.52 (t, *J* = 6.8 Hz, 2H), 4.25 (t, *J* = 6.8 Hz, 2H), 7.39 (d, *J* = 8.4 Hz, 1H), 7.47 (d, *J* = 8.4 Hz, 1H), 7.86-8.08 (m, 3H), 8.09 (d, *J* = 6.8 Hz, 1H). <sup>13</sup>C NMR (100 MHz; CDCl<sub>3</sub>): δ = 34.0, 41.0, 121.0, 125.3, 127.1, 127.2, 128.7, 131.3, 133.2, 134.5, 134.9, 137.1, 137.7, 138.6, 158.7, 198.0. HRMS (ESI-TOF) Calcd for C<sub>16</sub>H<sub>11</sub>Cl<sub>3</sub>NO<sub>4</sub>S, [M+H]<sup>+</sup> 417.9486; Found 417.9491.

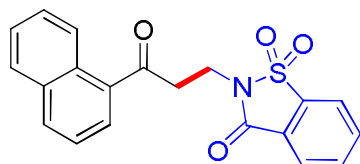

**2-(3-(naphthalen-1-yl)-3-oxopropyl)benzo[d]isothiazol-3(2H)-one 1,1-dioxide 2u**

White solid. Mp: 146-148 °C; <sup>1</sup>H NMR (400 MHz; CDCl<sub>3</sub>): δ = 3.68 (t, *J* = 7.6 Hz, 2H), 4.35 (t, *J* = 7.6 Hz, 2H), 7.48-7.63 (m, 6H), 7.83-8.03 (m, 4H), 8.07 (dd, *J*<sub>1</sub> = 1.6 Hz, *J*<sub>2</sub> = 7.2 Hz, 1H). <sup>13</sup>C NMR (100 MHz; CDCl<sub>3</sub>): δ = 34.7, 39.7, 121.0, 124.3, 125.2, 125.9, 126.6, 127.3, 128.3, 128.4, 128.5, 130.2, 133.5, 134.0, 134.8, 137.7, 158.8, 200.2. HRMS (ESI-TOF) Calcd for C<sub>20</sub>H<sub>16</sub>NO<sub>4</sub>S, [M+H]<sup>+</sup> 366.0876; Found 366.0873.

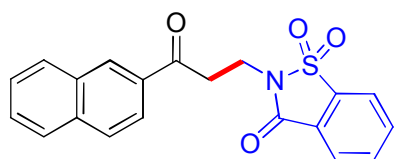

**2-(3-(naphthalen-2-yl)-3-oxopropyl)benzo[d]isothiazol-3(2H)-one 1,1-dioxide 2v**

White solid. Mp: 138-138 °C; <sup>1</sup>H NMR (400 MHz; CDCl<sub>3</sub>): δ = 3.73 (t, *J* = 7.6 Hz, 2H), 4.34 (t, *J* = 7.6 Hz, 2H), 7.57-7.60 (m, 2H), 7.62-8.06 (m, 8H), 8.10 (dd, *J*<sub>1</sub> = 1.2 Hz, *J*<sub>2</sub> = 7.2 Hz, 1H). <sup>13</sup>C NMR (100 MHz; CDCl<sub>3</sub>): δ = 34.6, 36.9, 121.0, 123.6, 125.2, 126.9, 127.4, 127.8, 128.6, 128.7, 129.6, 130.0, 132.5, 133.6, 134.4, 134.8, 135.8, 137.8, 158.8, 196.7. HRMS (ESI-TOF) Calcd for C<sub>20</sub>H<sub>16</sub>NO<sub>4</sub>S, [M+H]<sup>+</sup> 366.0876; Found 366.0874.

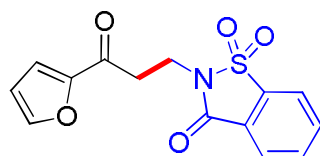

**2-(3-(furan-2-yl)-3-oxopropyl)benzo[d]isothiazol-3(2H)-one 1,1-dioxide 2w**

White solid. Mp: 103-105 °C; <sup>1</sup>H NMR (400 MHz; CDCl<sub>3</sub>): δ = 3.44 (dd, *J*<sub>1</sub> = 1.2 Hz, *J*<sub>2</sub> = 8.0 Hz, 2H), 4.24 (dd, *J*<sub>1</sub> = 1.2 Hz, *J*<sub>2</sub> = 7.6 Hz, 2H), 6.55 (dd, *J*<sub>1</sub> = 1.2 Hz, *J*<sub>2</sub> = 7.6 Hz, 1H), 7.25 (dd, *J*<sub>1</sub> = 0.8 Hz, *J*<sub>2</sub> = 6.4 Hz, 1H), 7.60 (t, *J* = 1.6 Hz, 1H), 7.85-7.95 (m, 3H), 8.07-8.09 (m, 1H). <sup>13</sup>C NMR (100 MHz; CDCl<sub>3</sub>): δ = 34.0, 36.7, 112.4, 117.5, 121.0, 125.2, 127.3, 134.4, 134.8, 137.7, 146.7, 152.2, 158.7, 185.6. HRMS (ESI-TOF) Calcd for C<sub>14</sub>H<sub>12</sub>NO<sub>5</sub>S, [M+H]<sup>+</sup> 306.0438; Found 306.0436.

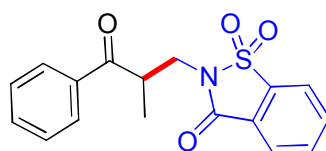

**(R)-2-(2-methyl-3-oxo-3-phenylpropyl)benzo[d]isothiazol-3(2H)-one 1,1-dioxide 4a**

White solid. Mp: 113-114 °C; <sup>1</sup>H NMR (400 MHz; CDCl<sub>3</sub>): δ = 1.35 (d, *J* = 7.2 Hz, 3H), 3.99 (t, *J* = 6.4 Hz, 1H), 4.24 (dd, *J*<sub>1</sub> = 3.2 Hz, *J*<sub>2</sub> = 7.2 Hz, 2H), 7.26 (d, *J* = 8.8 Hz, 2H), 7.57 (d, *J* = 7.2 Hz, 1H), 7.84-7.88 (m, 2H), 7.88-7.94 (m, 1H), 8.01-8.08 (m, 3H). <sup>13</sup>C NMR (100 MHz; CDCl<sub>3</sub>): δ = 16.3, 39.5, 41.6, 121.0, 125.3, 127.2, 128.5, 128.8, 133.4, 134.4, 134.8, 135.7, 137.6, 159.1, 201.0.

HRMS (ESI-TOF) Calcd for C<sub>17</sub>H<sub>16</sub>NO<sub>4</sub>S, [M+H]<sup>+</sup> 330.0800; Found 330.0803.

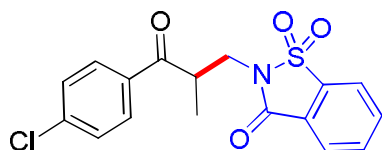

**(R)-2-(3-(4-chlorophenyl)-2-methyl-3-oxopropyl)benzo[d]isothiazol-3(2H)-one 1,1-dioxide 4b**

White solid. Mp: 160-161 °C; <sup>1</sup>H NMR (400 MHz; CDCl<sub>3</sub>): δ = 1.33 (d, *J* = 7.2 Hz, 3H), 3.96 (m, 1H), 4.16-4.26 (m, 2H), 7.44-7.47 (m, 2H), 8.46 (dd, *J*<sub>1</sub> = 1.6 Hz, *J*<sub>2</sub> = 7.2 Hz, 3H), 7.88-7.93 (m, 2H), 7.94-8.06 (m, 1H). <sup>13</sup>C NMR (100 MHz; CDCl<sub>3</sub>): δ = 16.2, 39.5, 41.5, 121.0, 125.3, 127.2, 134.0, 134.4, 134.9, 159.1, 199.8. HRMS (ESI-TOF) Calcd for C<sub>17</sub>H<sub>15</sub>ClNO<sub>4</sub>S, [M+H]<sup>+</sup> 364.0409; Found 364.0405.

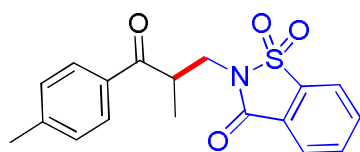

**(R)-2-(2-methyl-3-oxo-3-(p-tolyl)propyl)benzo[d]isothiazol-3(2H)-one 1,1-dioxide 4c**

White solid. Mp: 131-133 °C; <sup>1</sup>H NMR (400 MHz; CDCl<sub>3</sub>): δ = 1.33 (d, *J* = 7.2 Hz, 3H), 2.41 (s, 3H), 3.98 (t, *J* = 6.4 Hz, 1H), 4.19-4.24 (m, 2H), 7.28 (d, *J* = 6.4 Hz, 2H), 7.84 (dd, *J*<sub>1</sub> = 1.6 Hz, *J*<sub>2</sub> = 7.2 Hz, 2H), 7.87-7.83 (m, 3H), 8.06 (dd, *J*<sub>1</sub> = 1.2 Hz, *J*<sub>2</sub> = 6.4 Hz, 1H). <sup>13</sup>C NMR (100 MHz; CDCl<sub>3</sub>): δ = 16.3, 21.6, 39.3, 41.6, 120.9, 125.3, 127.2, 128.7, 129.5, 133.1, 134.4, 134.8, 137.6, 144.3, 159.1, 200.7. HRMS (ESI-TOF) Calcd for C<sub>18</sub>H<sub>18</sub>NO<sub>4</sub>S, [M+H]<sup>+</sup> 344.0951; Found 344.0954.

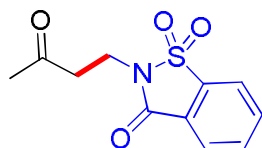

**2-(3-oxobutyl)benzo[d]isothiazol-3(2H)-one 1,1-dioxide 4d**

White solid. Mp: 113-115 °C; <sup>1</sup>H NMR (400 MHz; CDCl<sub>3</sub>): δ = 2.21 (s, 3H), 3.03 (t, *J* = 7.6 Hz, 2H), 4.05 (t, *J* = 7.6 Hz, 2H), 7.83-7.89 (m, 3H), 7.91-8.07 (m, 1H). <sup>13</sup>C NMR (100 MHz; CDCl<sub>3</sub>): δ = 30.1, 33.8, 41.2, 121.0, 125.2, 127.2, 134.4, 134.9, 137.6, 158.7, 205.4. HRMS (ESI-TOF) Calcd for C<sub>11</sub>H<sub>12</sub>NO<sub>4</sub>S, [M+H]<sup>+</sup> 254.0479; Found 254.0472.

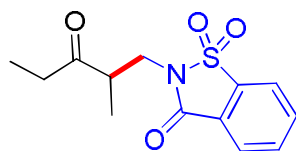

**(R)-2-(2-methyl-3-oxopentyl)benzo[d]isothiazol-3(2H)-one 1,1-dioxide 4e**

White solid. Mp: 90-91 °C; <sup>1</sup>H NMR (400 MHz; CDCl<sub>3</sub>): δ = 1.08 (t, *J* = 7.2 Hz, 3H), 1.24 (d, *J* = 7.2 Hz, 3H), 2.50 (q, *J* = 7.2 Hz, 1H), 2.63 (q, *J* = 7.2 Hz, 1H), 3.27 (q, *J* = 7.6 Hz, 1H), 3.80 (q, *J* = 7.2 Hz, 1H), 4.10 (q, *J* = 7.6 Hz, 1H), 7.84-7.94 (m, 3H), 8.08 (dd, *J*<sub>1</sub> = 1.6 Hz, *J*<sub>2</sub> = 6.8 Hz, 1H). <sup>13</sup>C NMR (100 MHz; CDCl<sub>3</sub>): δ = 7.5, 15.3, 34.7, 41.0, 44.2, 120.9, 125.3, 127.2, 134.4, 134.8,

137.6, 159.0, 211.8. HRMS (ESI-TOF) Calcd for C<sub>13</sub>H<sub>16</sub>NO<sub>4</sub>S, [M+H]<sup>+</sup> 282.0792; Found 282.0794.

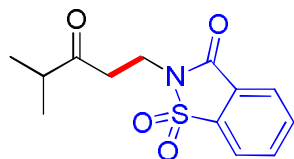

**2-(4-methyl-3-oxopentyl)benzo[d]isothiazol-3(2H)-one 1,1-dioxide 4f**

Yellow liquid. <sup>1</sup>H NMR (400 MHz; CDCl<sub>3</sub>): δ = 1.14 (d, *J* = 7.2 Hz, 6H), 2.59-2.66 (m, 1H), 3.05 (t, *J* = 7.6 Hz, 2H), 4.08 (t, *J* = 7.6 Hz, 2H), 7.84-7.94 (m, 3H), 8.08 (dd, *J*<sub>1</sub> = 1.2 Hz, *J*<sub>2</sub> = 6.4 Hz, 1H). <sup>13</sup>C NMR (100 MHz; CDCl<sub>3</sub>): δ = 18.0, 34.1, 38.2, 41.0, 120.9, 125.2, 127.4, 134.3, 134.8, 137.8, 158.7, 211.1. HRMS (ESI-TOF) Calcd for C<sub>13</sub>H<sub>16</sub>NO<sub>4</sub>S, [M+H]<sup>+</sup> 281.0722; Found 282.0795.

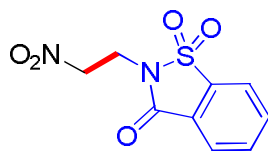

**2-(2-nitroethyl)benzo[d]isothiazol-3(2H)-one 1,1-dioxide 4g**

Yellow liquid. <sup>1</sup>H NMR (400 MHz; CDCl<sub>3</sub>): δ = 4.43 (t, *J* = 6.4 Hz, 2H), 4.80 (t, *J* = 6.4 Hz, 2H), 7.88-7.96 (m, 3H), 8.09 (d, *J* = 6.8 Hz, 1H). <sup>13</sup>C NMR (100 MHz; CDCl<sub>3</sub>): δ = 35.4, 71.7, 121.2, 125.6, 126.8, 134.7, 135.3, 137.5, 158.7. HRMS (ESI-TOF) Calcd for C<sub>9</sub>H<sub>9</sub>N<sub>2</sub>O<sub>5</sub>S, [M+H]<sup>+</sup> 257.0232; Found 257.0235.

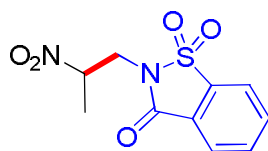

**(R)-2-(2-nitropropyl)benzo[d]isothiazol-3(2H)-one 1,1-dioxide 4h**

Yellow liquid. <sup>1</sup>H NMR (400 MHz; CDCl<sub>3</sub>): δ = 1.69 (d, *J* = 6.8 Hz, 3H), 4.03-4.17 (m, 1H), 4.41-4.49 (m, 1H), 5.07-5.12 (m, 1H), 7.88-8.04 (m, 3H), 8.09 (d, *J* = 6.8 Hz, 1H). <sup>13</sup>C NMR (100 MHz; CDCl<sub>3</sub>): δ = 17.3, 41.6, 80.0, 121.2, 125.6, 126.1, 134.7, 135.3, 137.4, 158.9. HRMS (ESI-TOF) Calcd for C<sub>10</sub>H<sub>11</sub>N<sub>2</sub>O<sub>5</sub>S, [M+H]<sup>+</sup> 271.0381; Found 271.0385.

VI.  $^1\text{H}$  NMR and  $^{13}\text{C}$  NMR spectra copies of compounds 2, 4, C and H.

Compound 2a

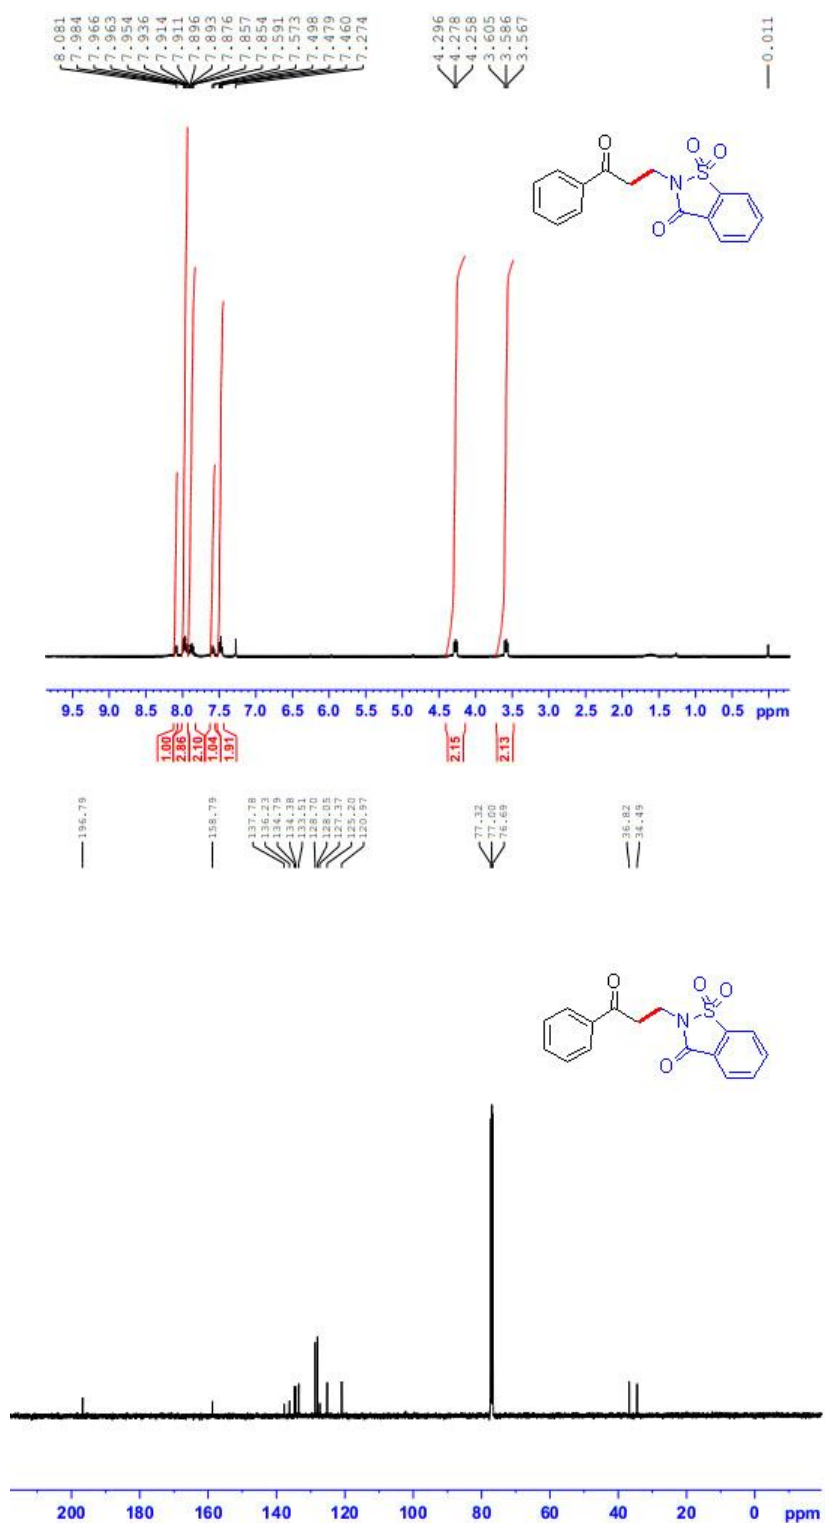

# Compound 2b

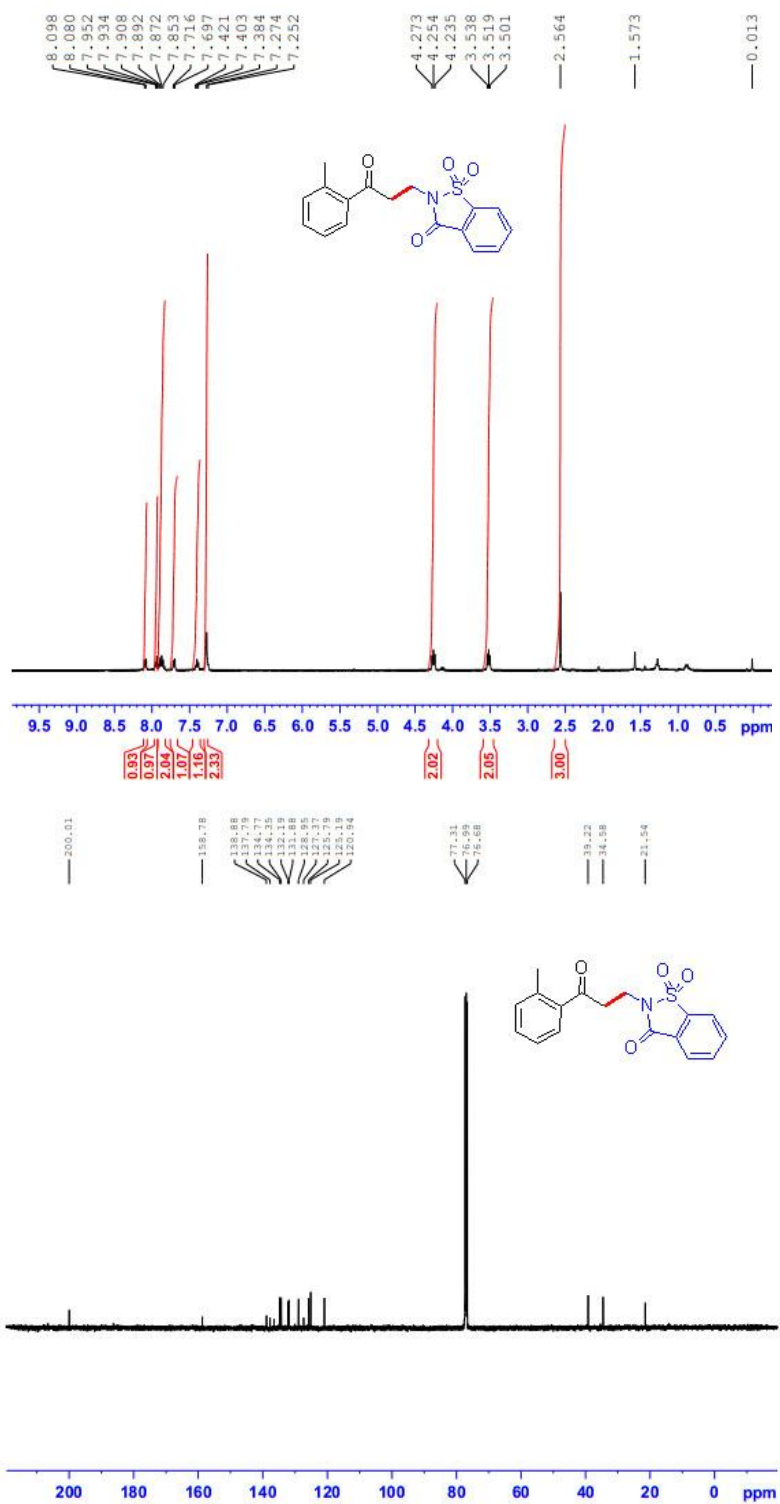

# Compound 2c

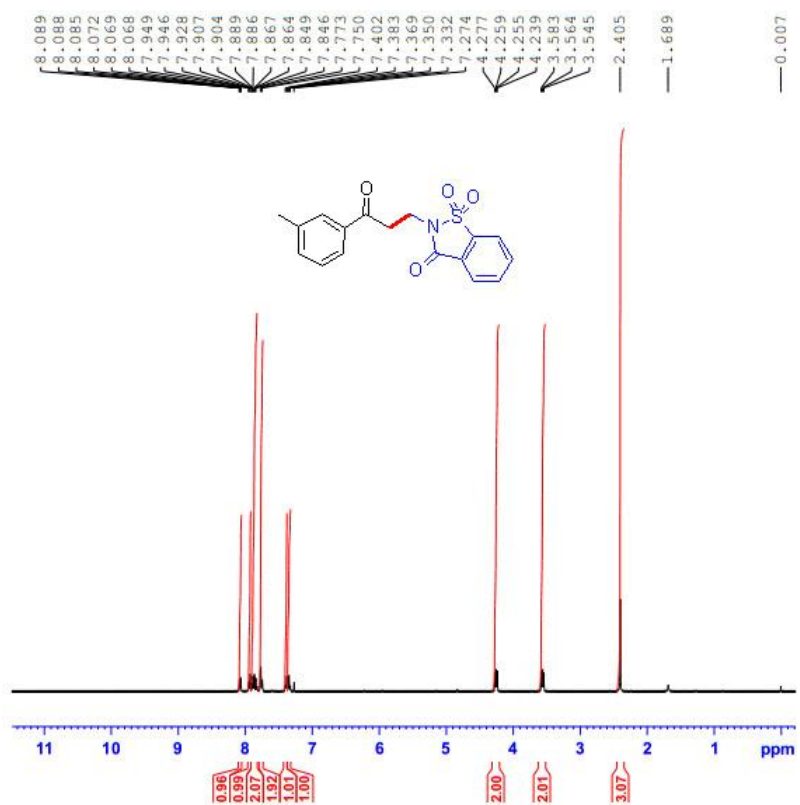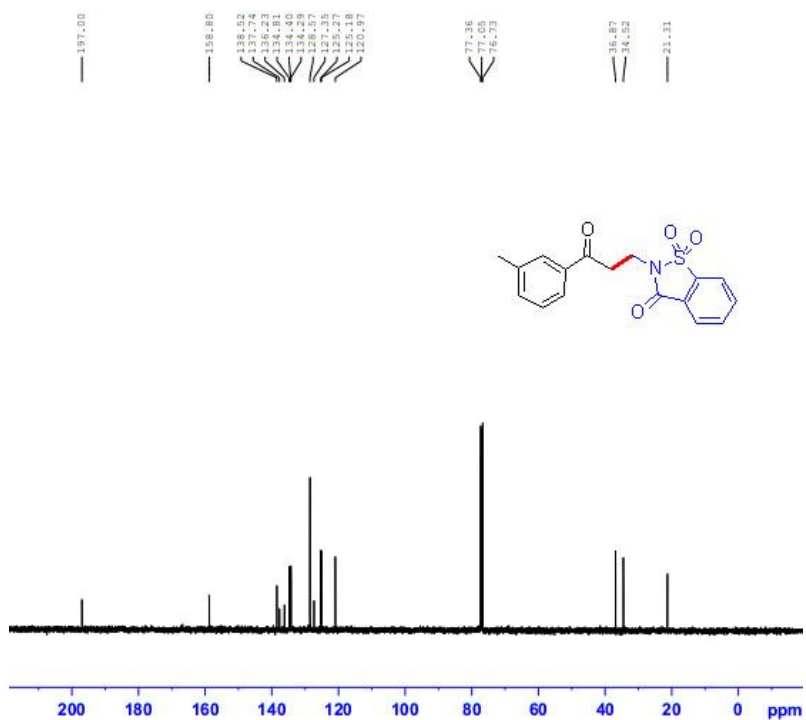

# Compound 2d

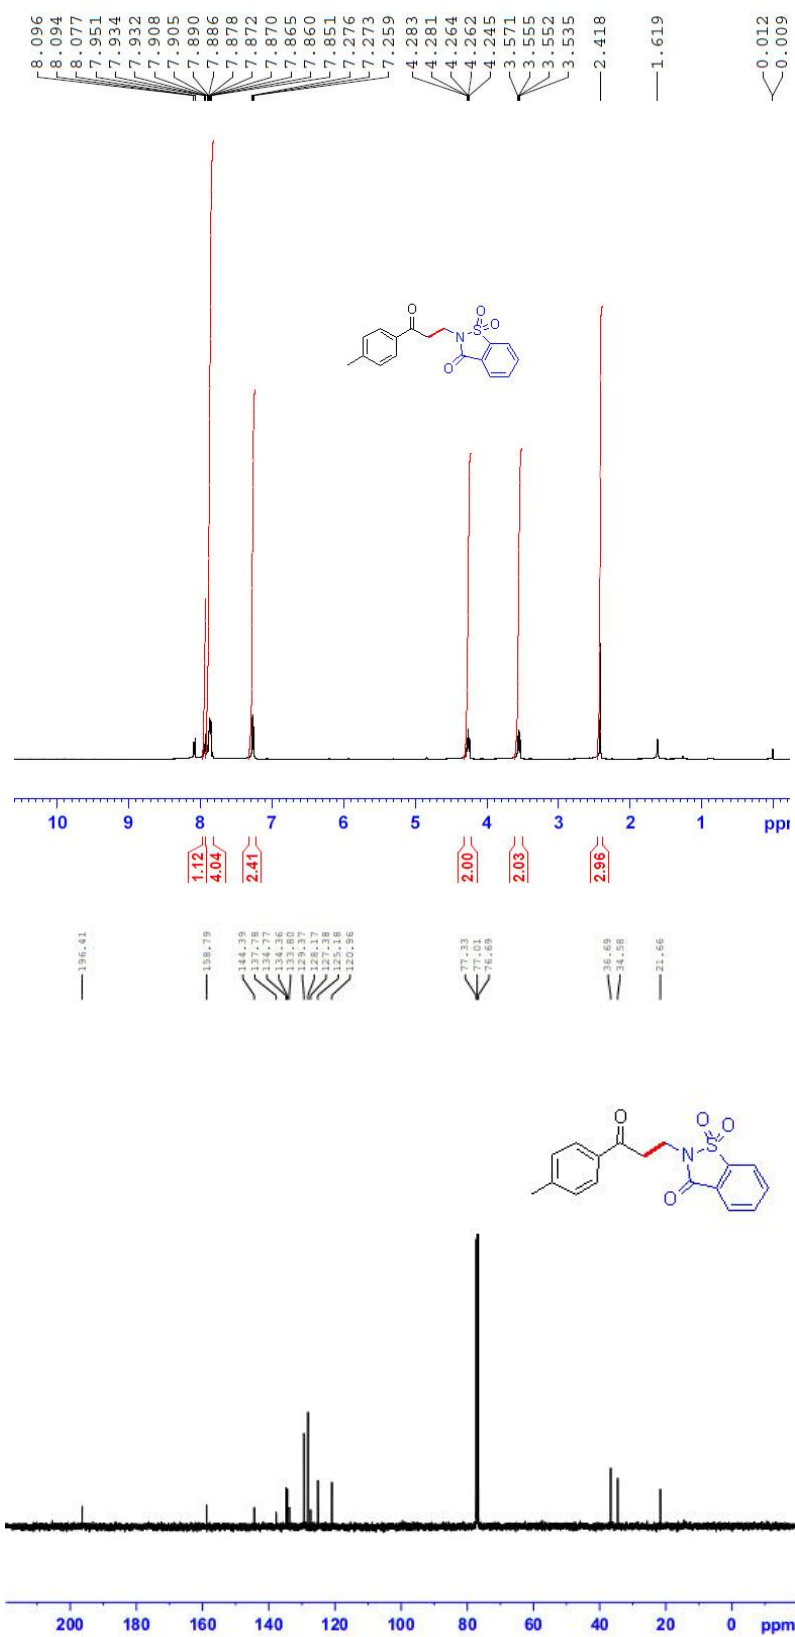



# Compound 2e

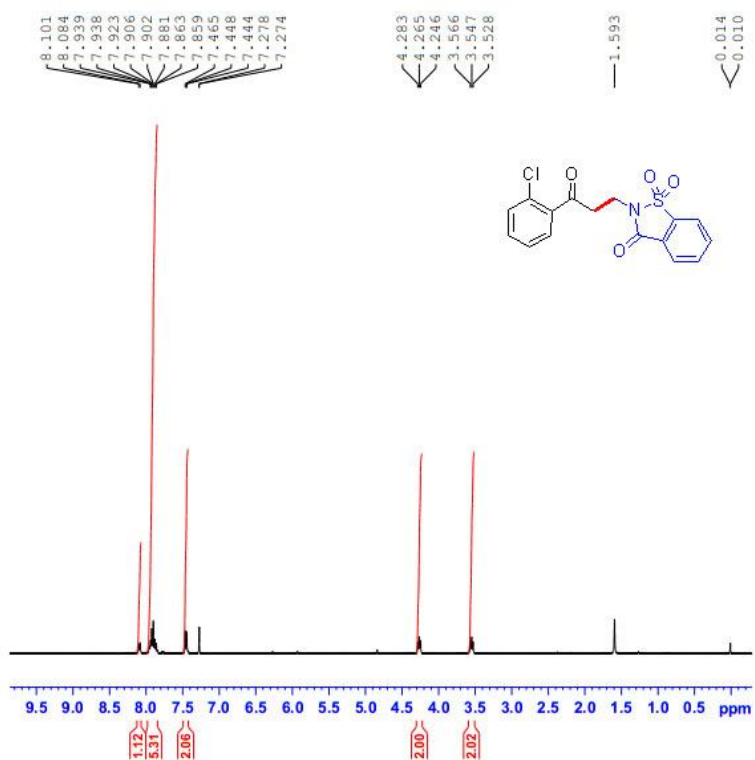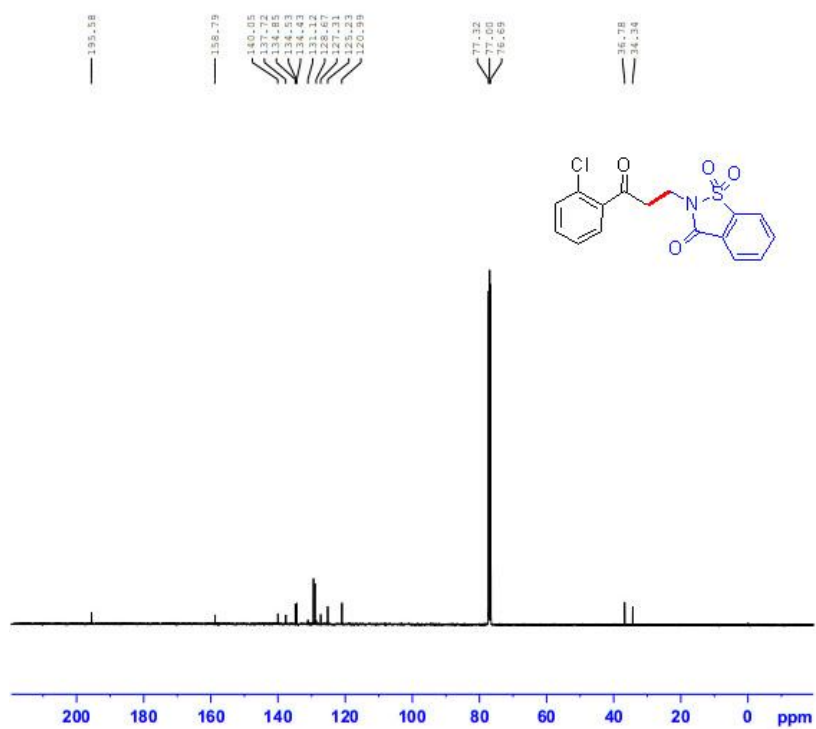

# Compound 2f

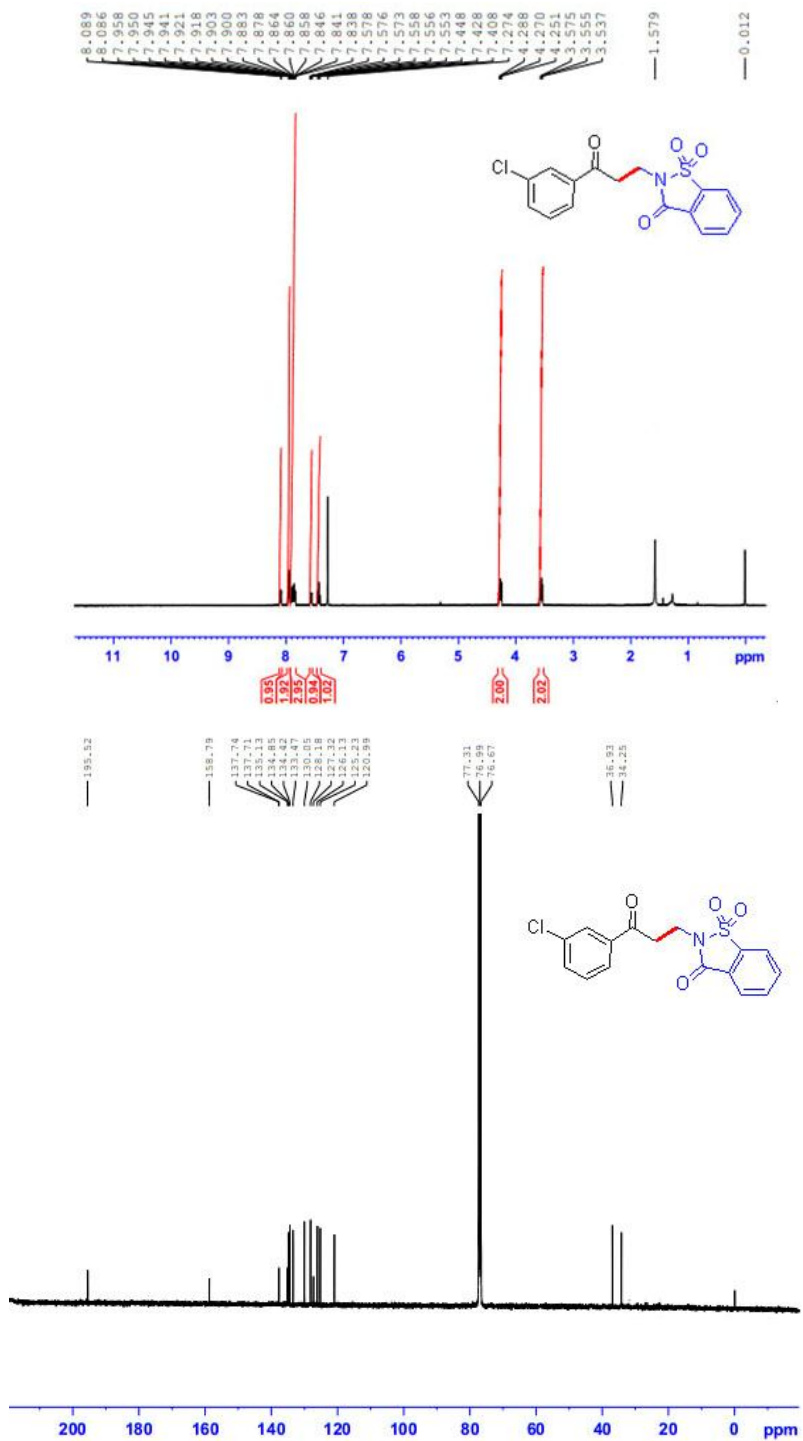

### Compound 2g

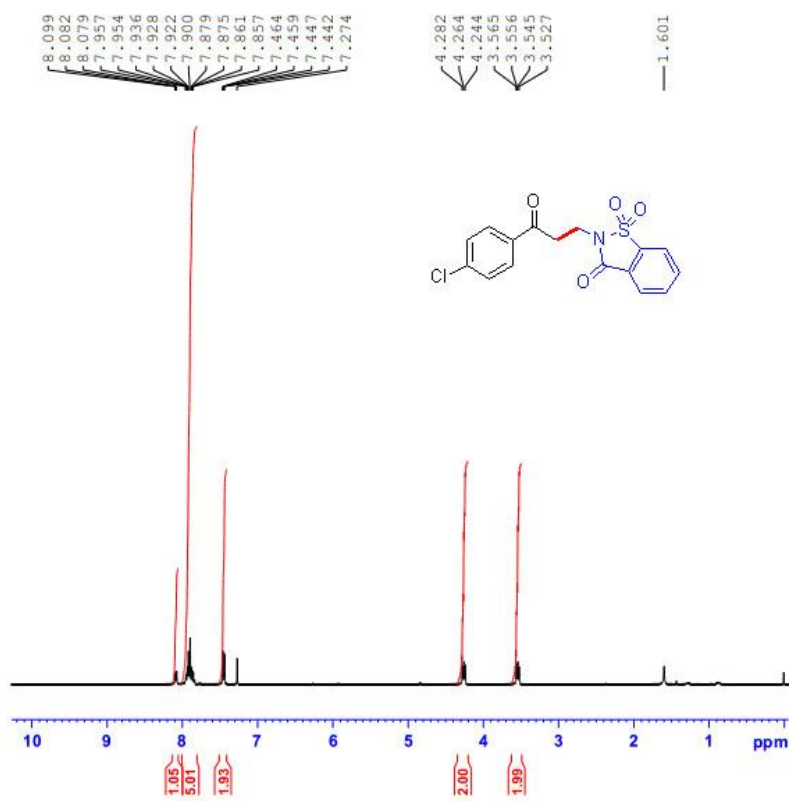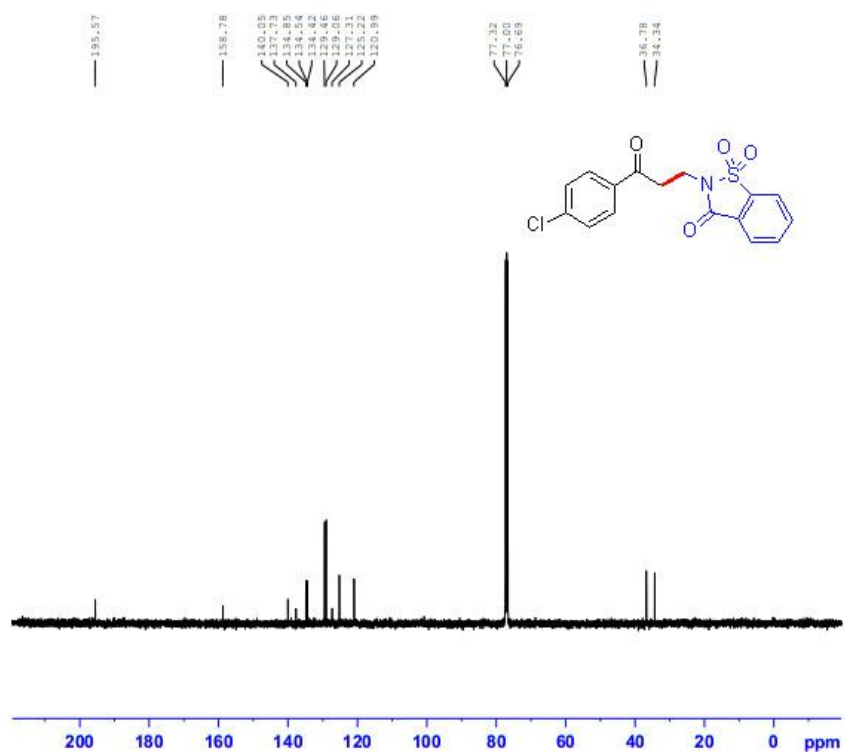

# Compound 2h

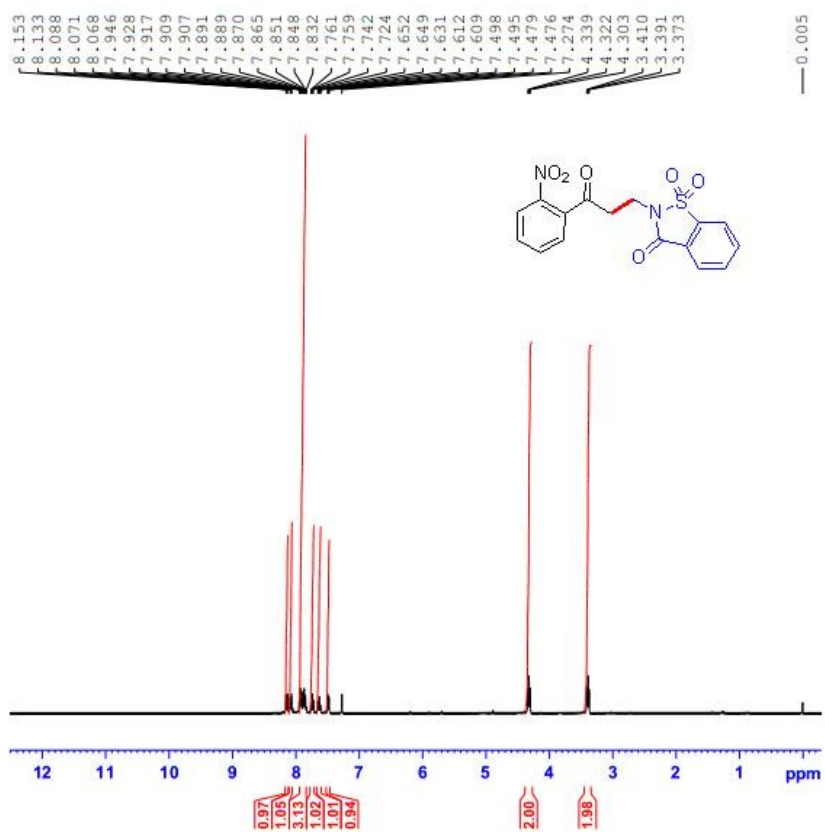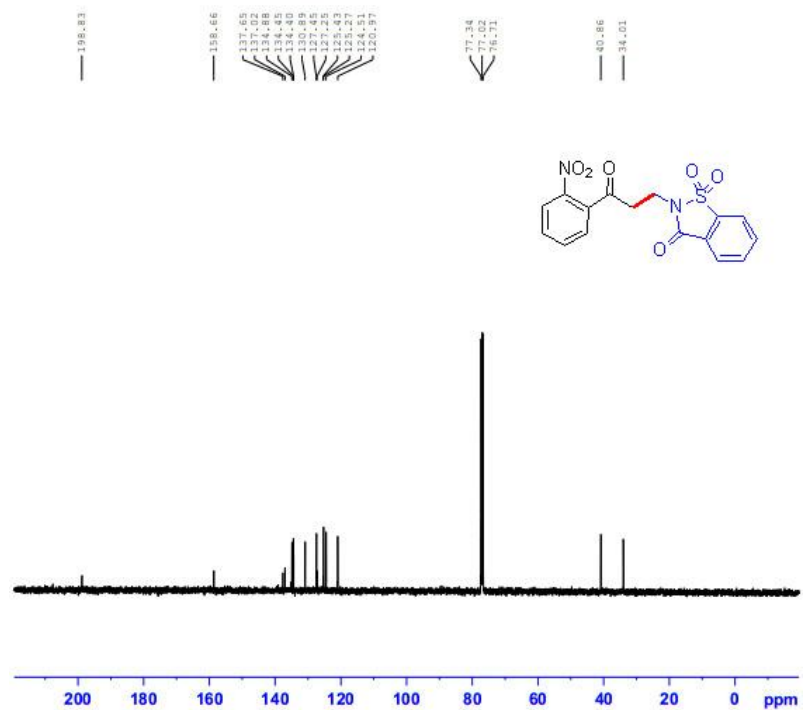

# Compound 2i

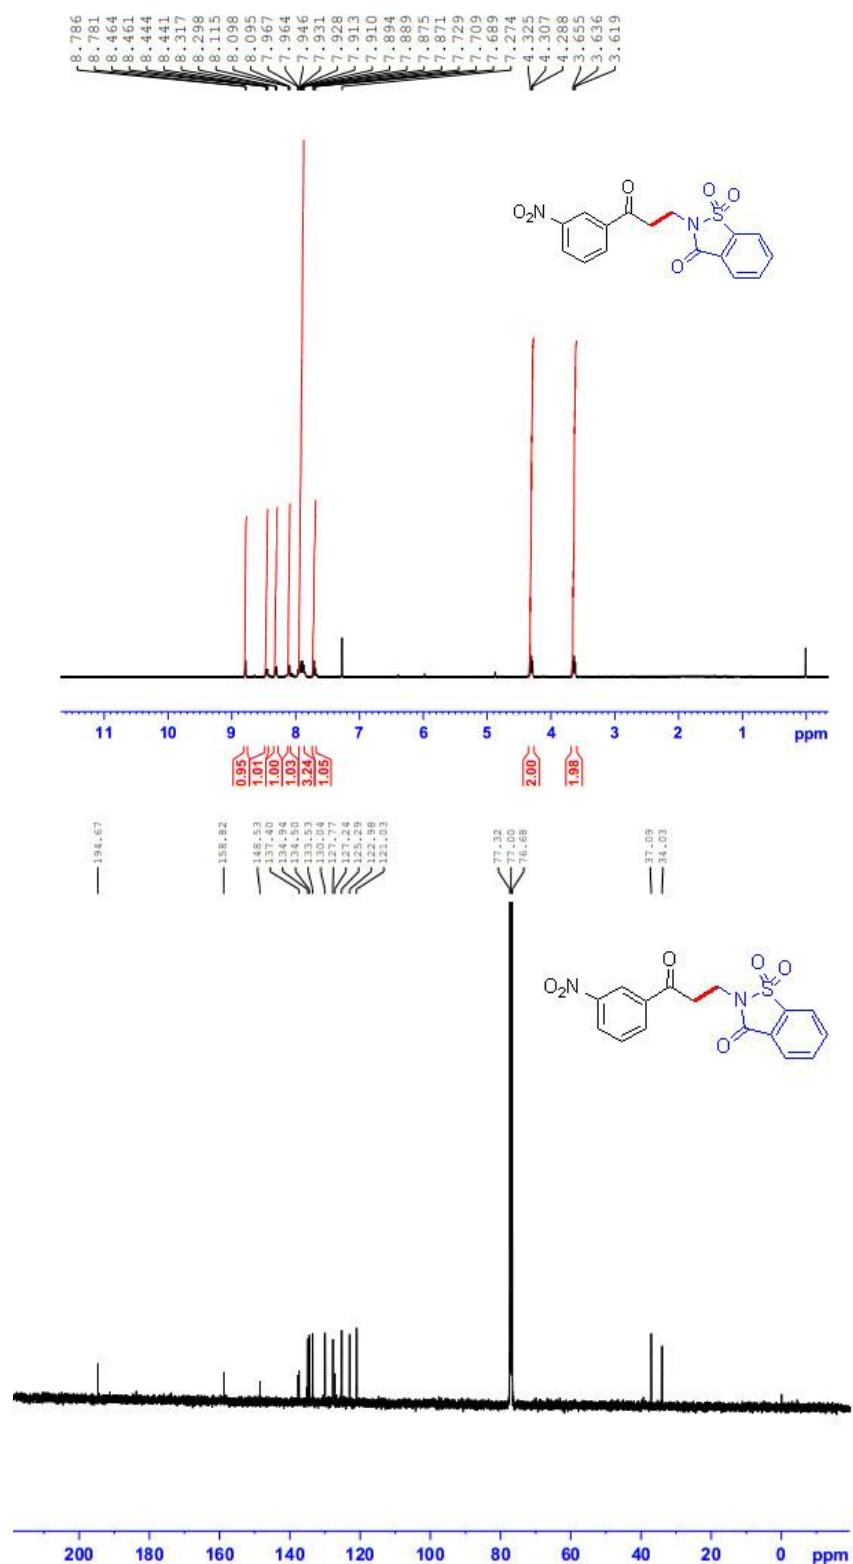

Compound 2j

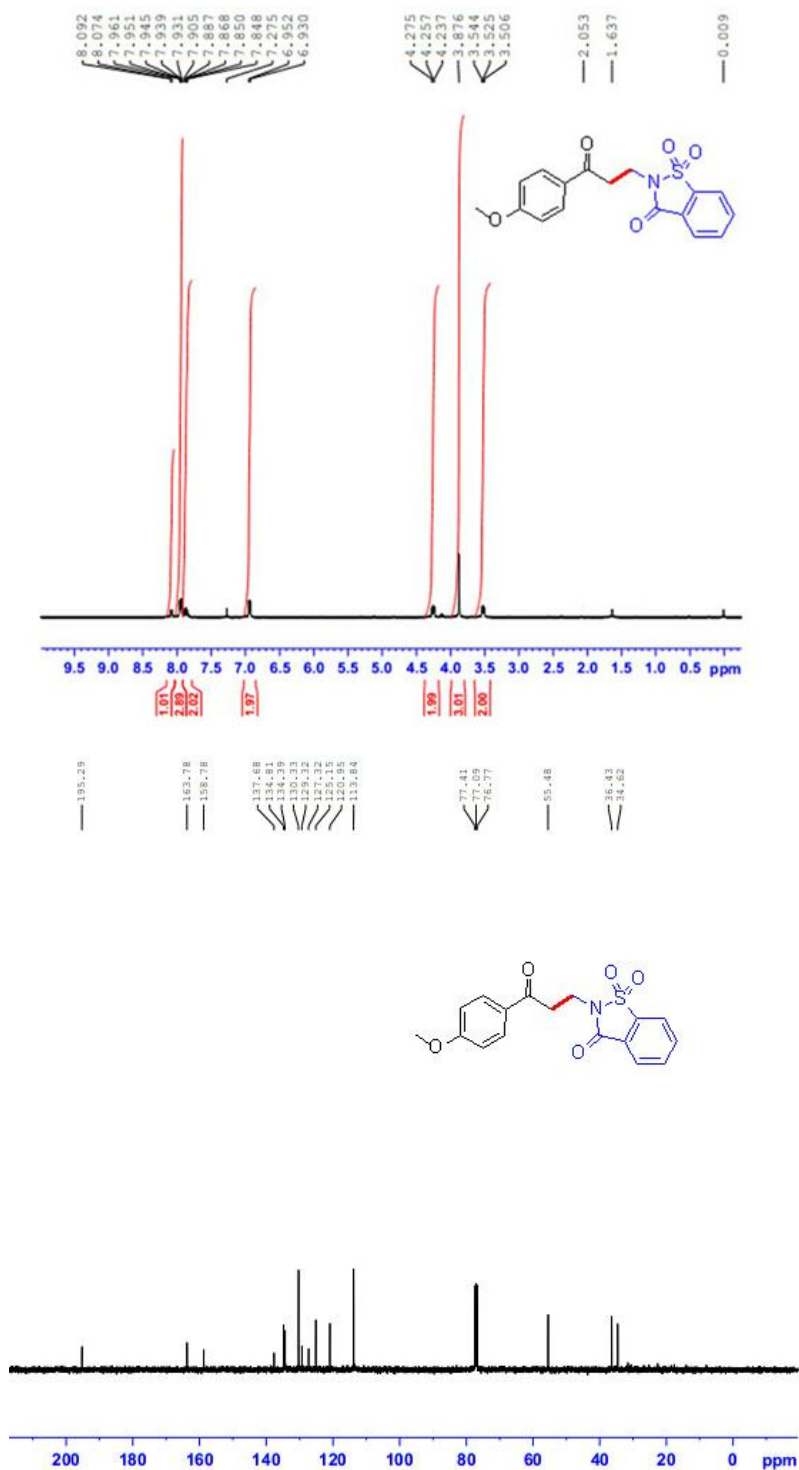

# Compound 2k

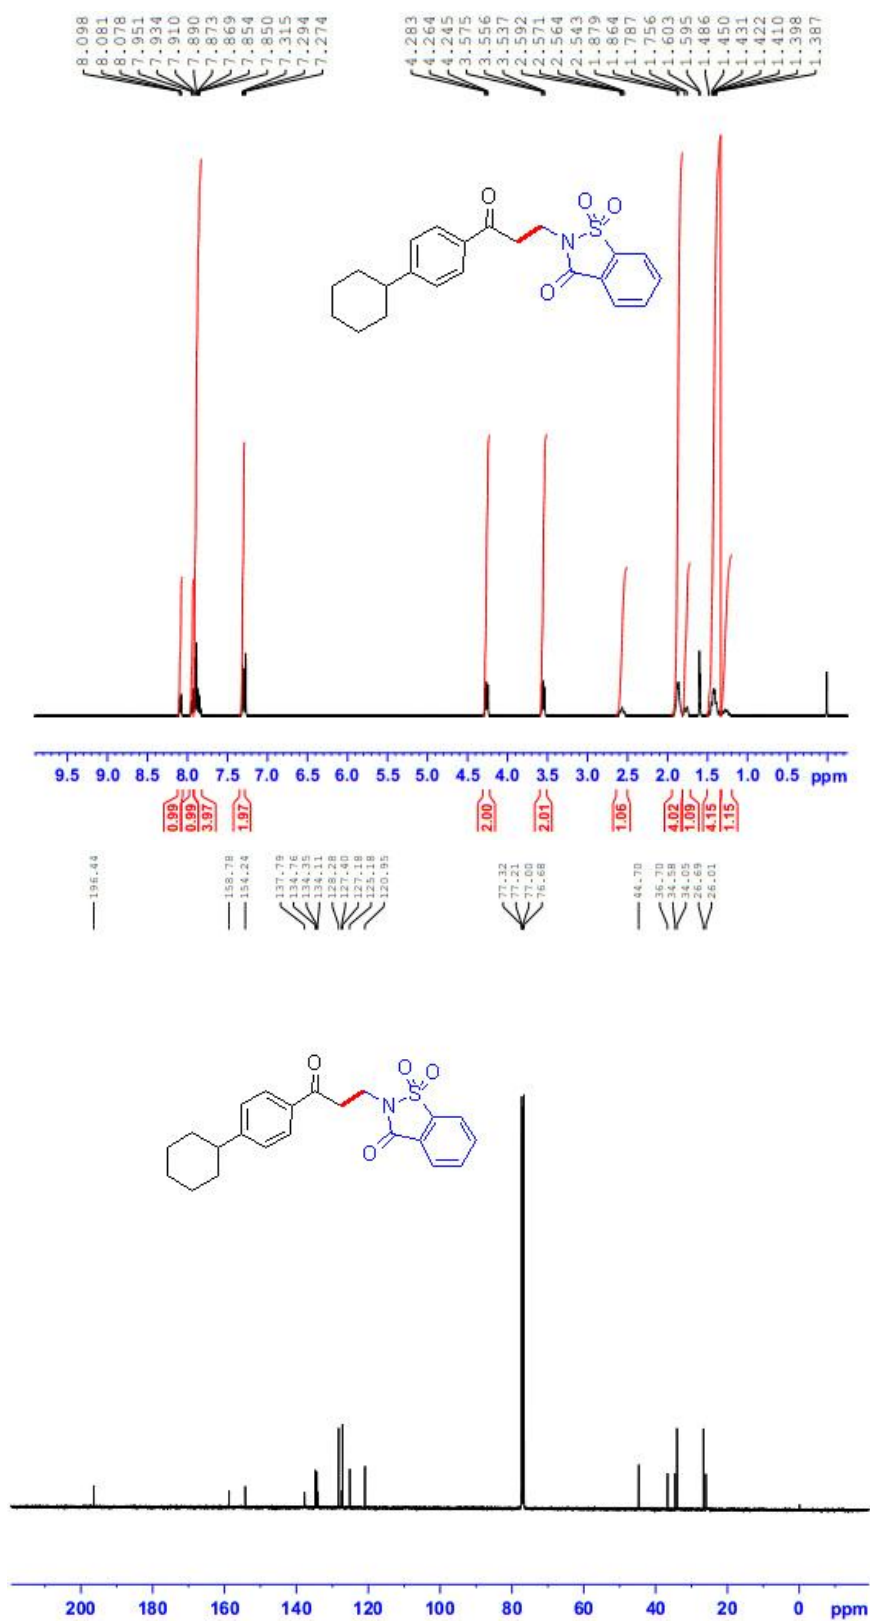

Compound 21

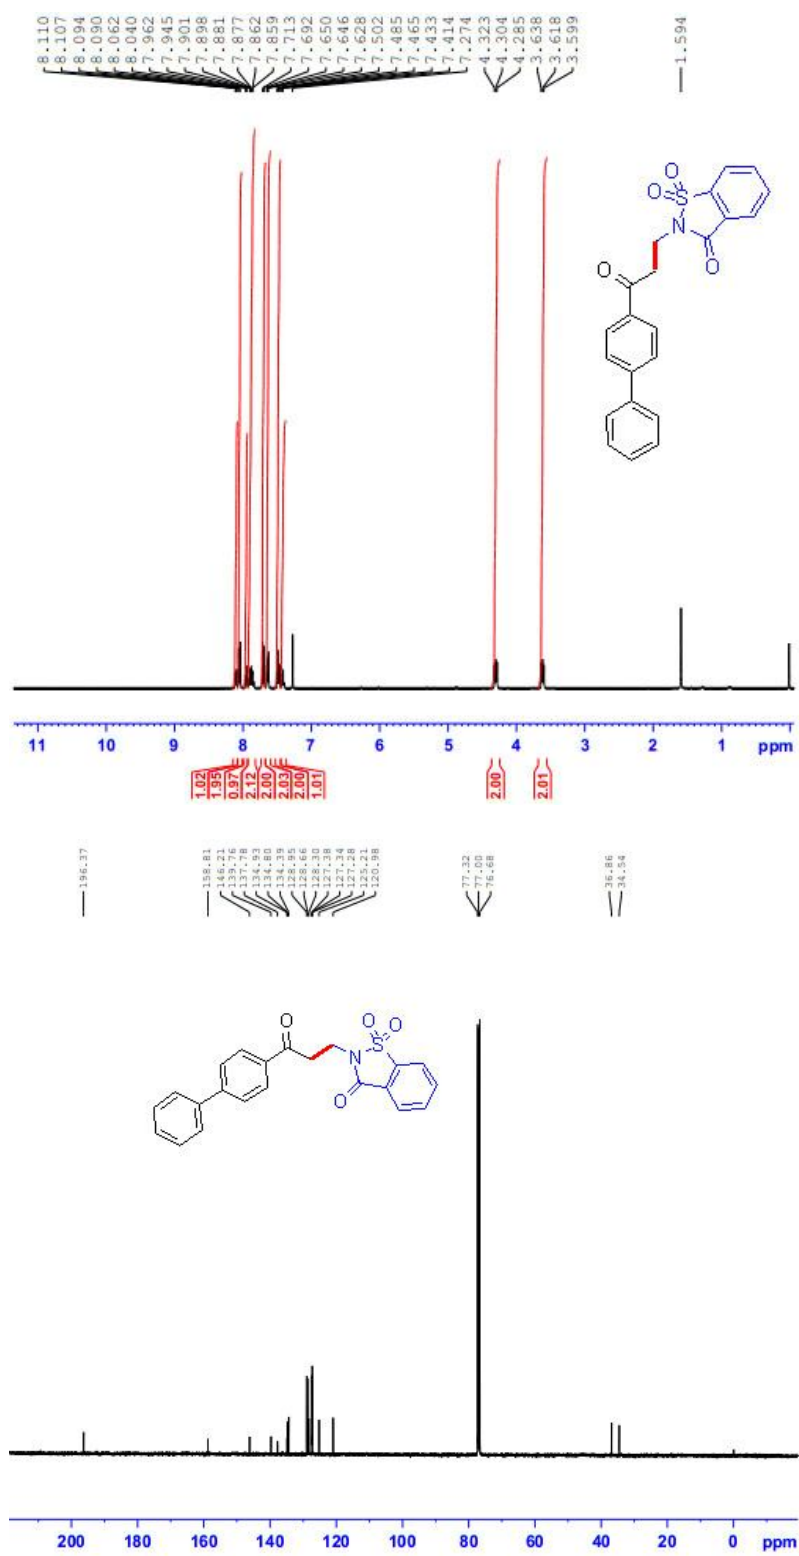



Compound 2m

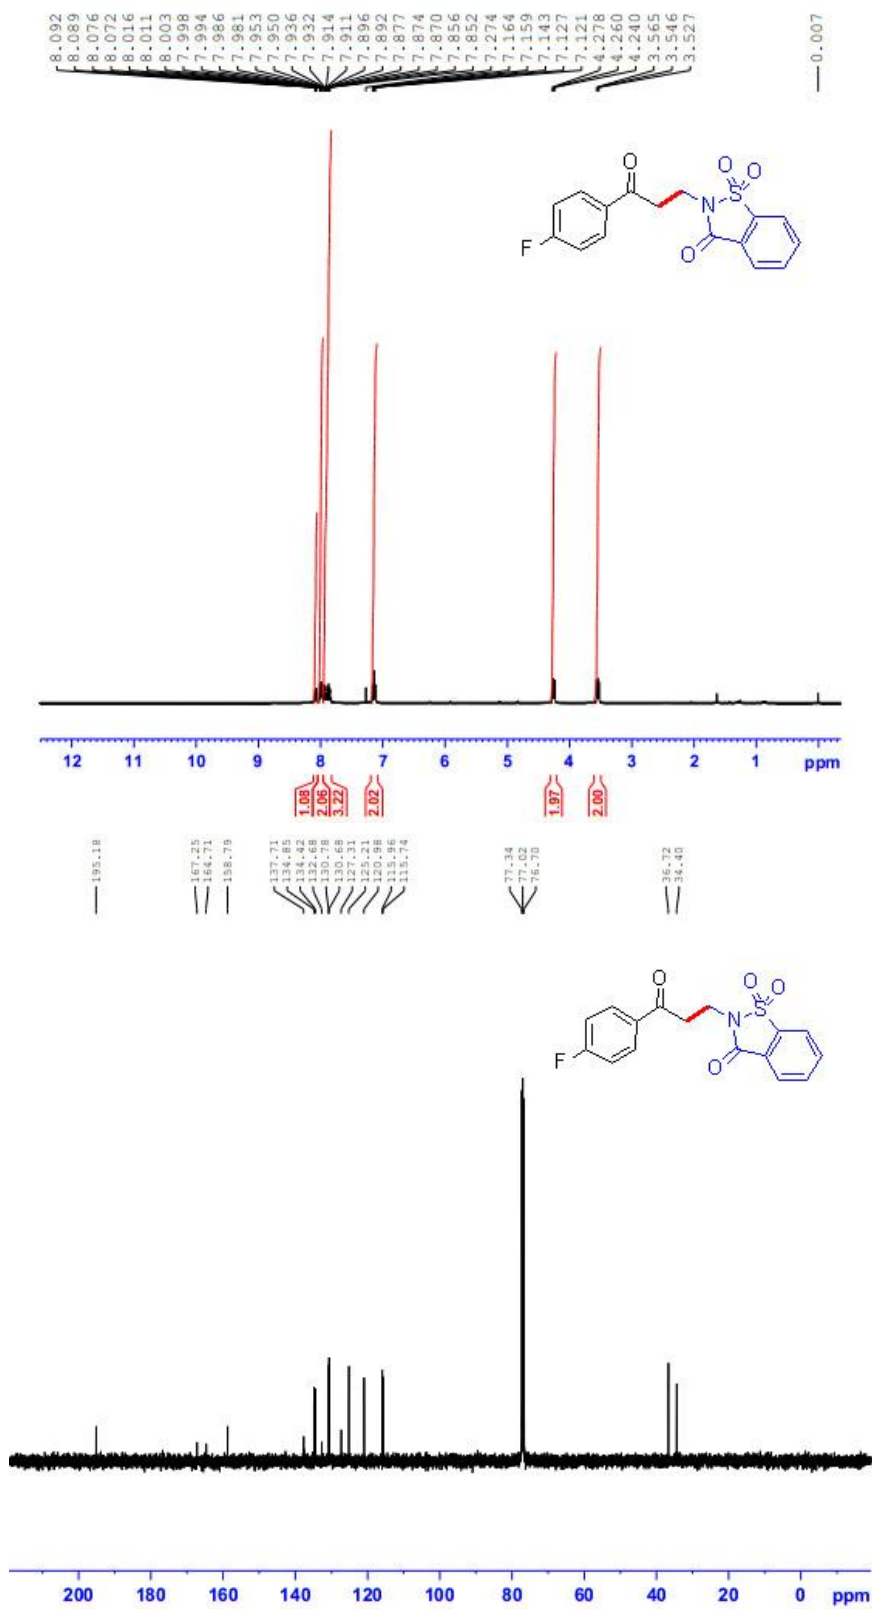

# Compound 2n

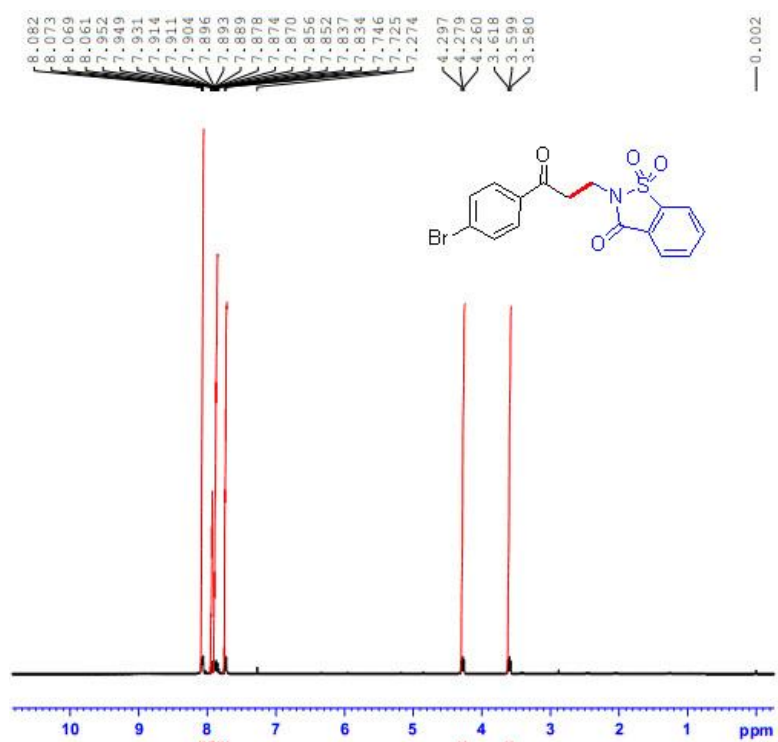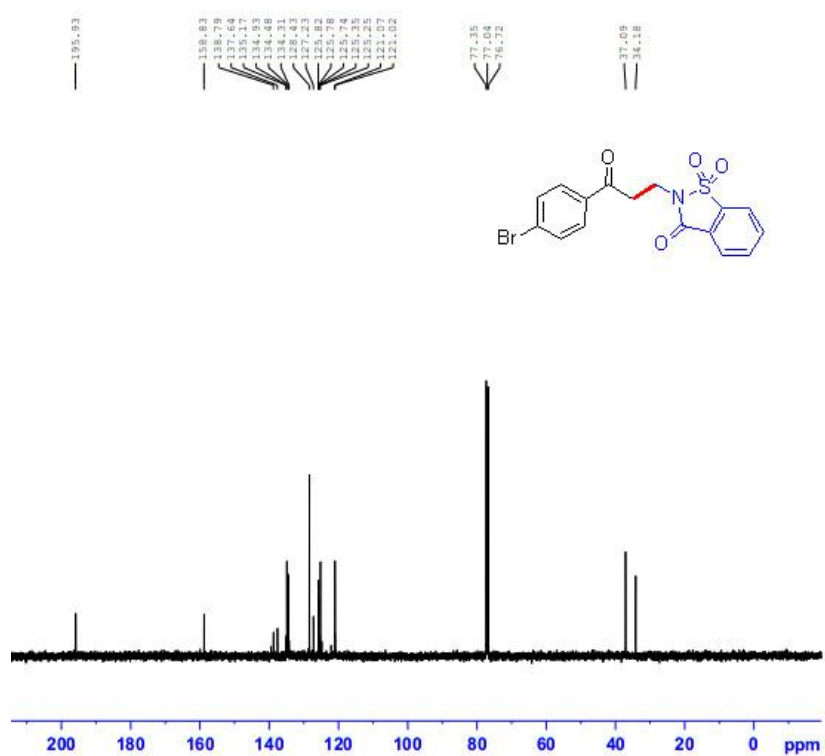

Compound 2o

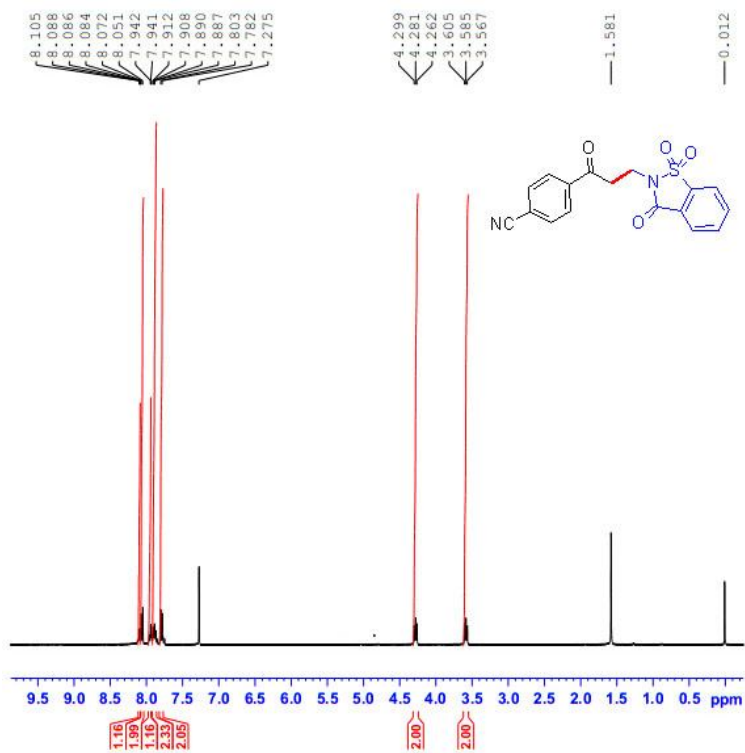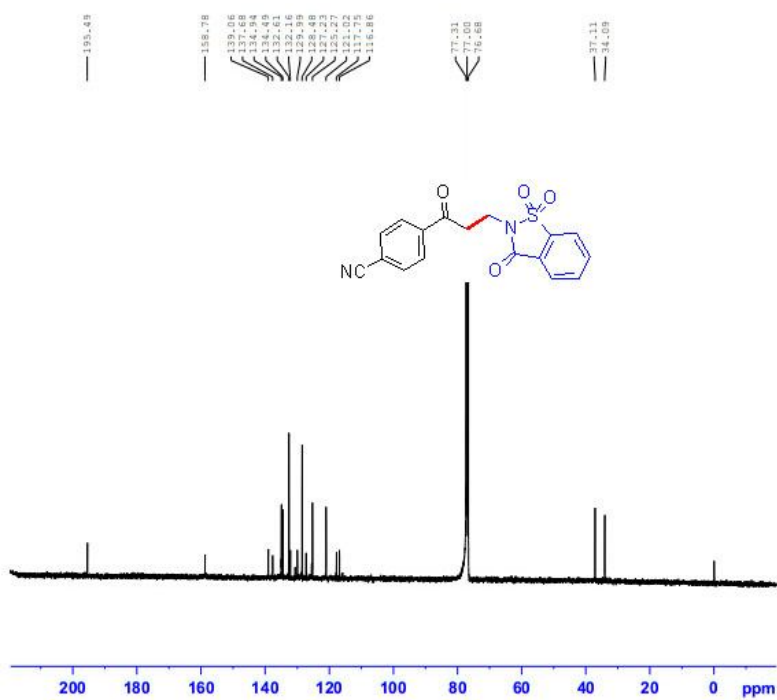

# Compound 2p

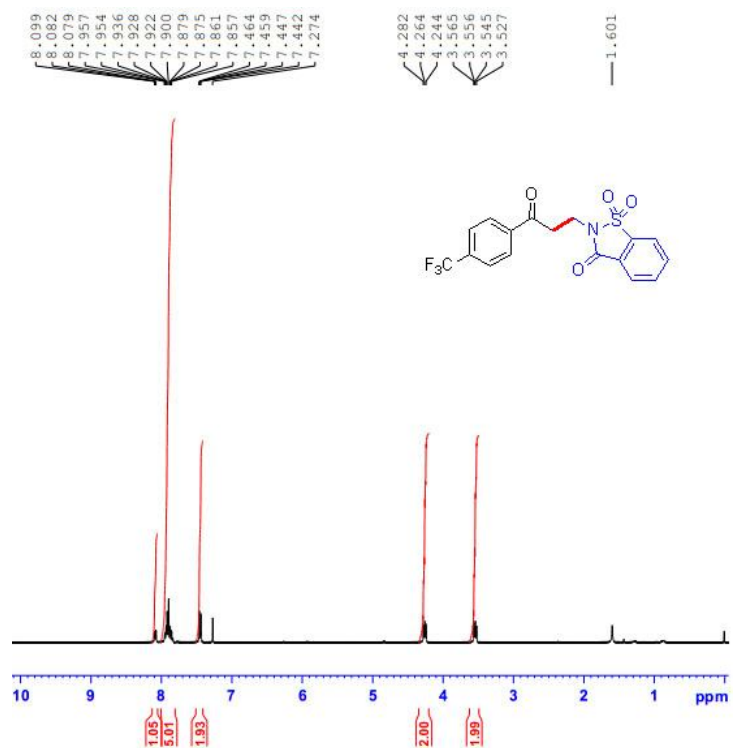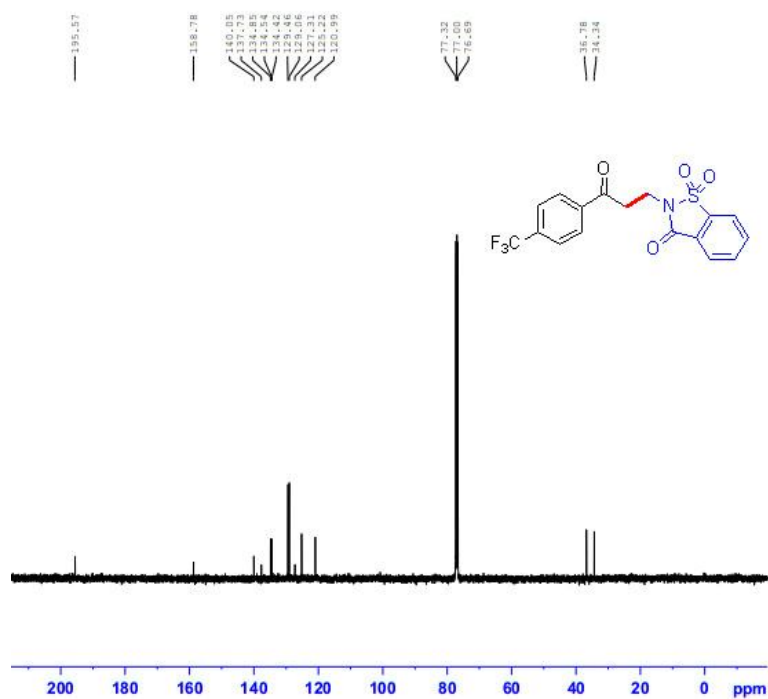

# Compound 2q

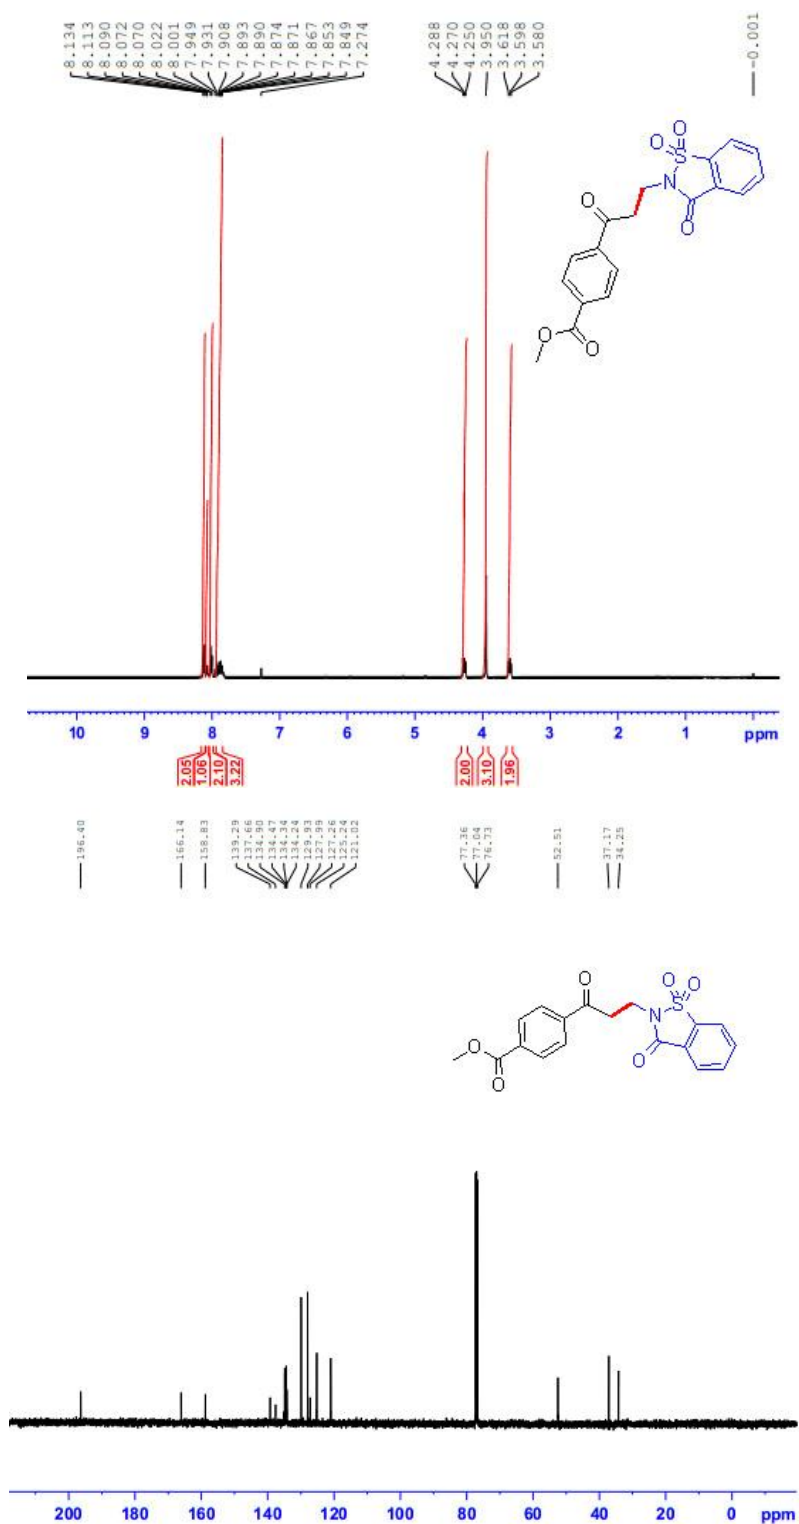

# Compound 2r

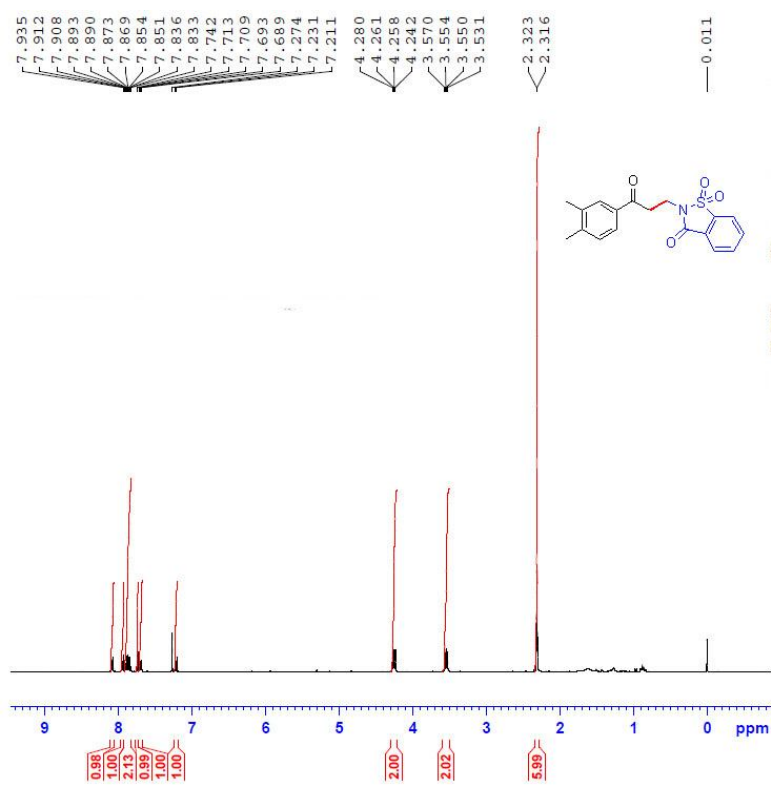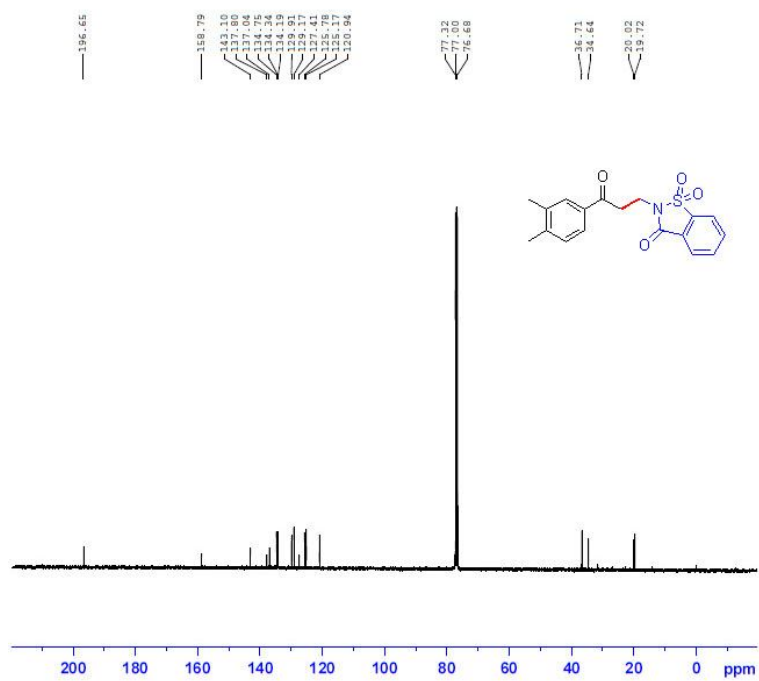

# Compound 2s

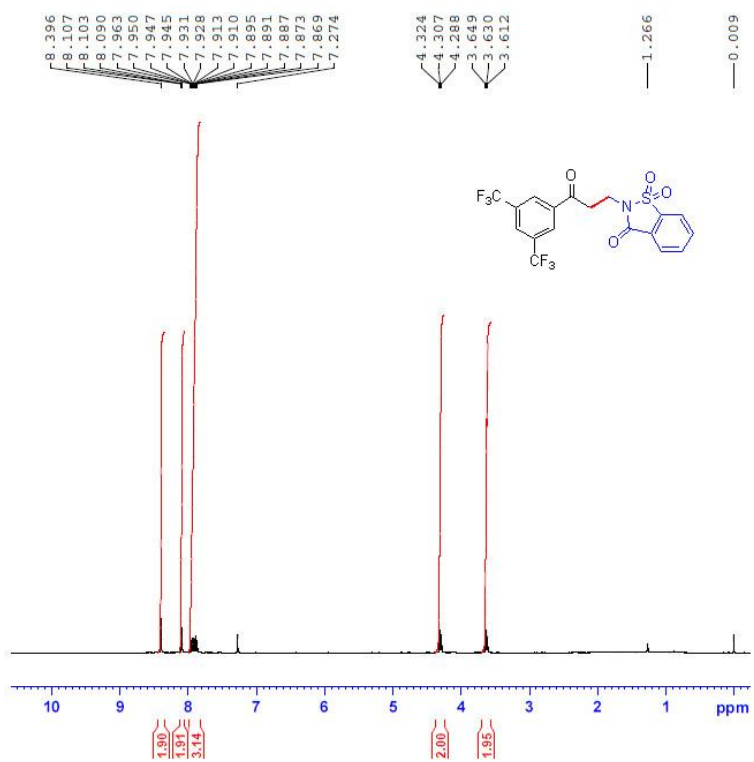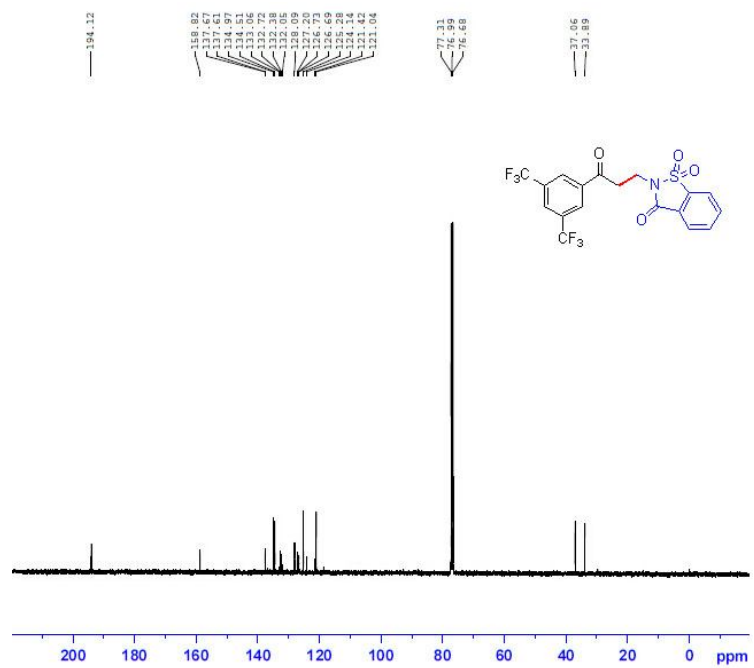

Compound 2t

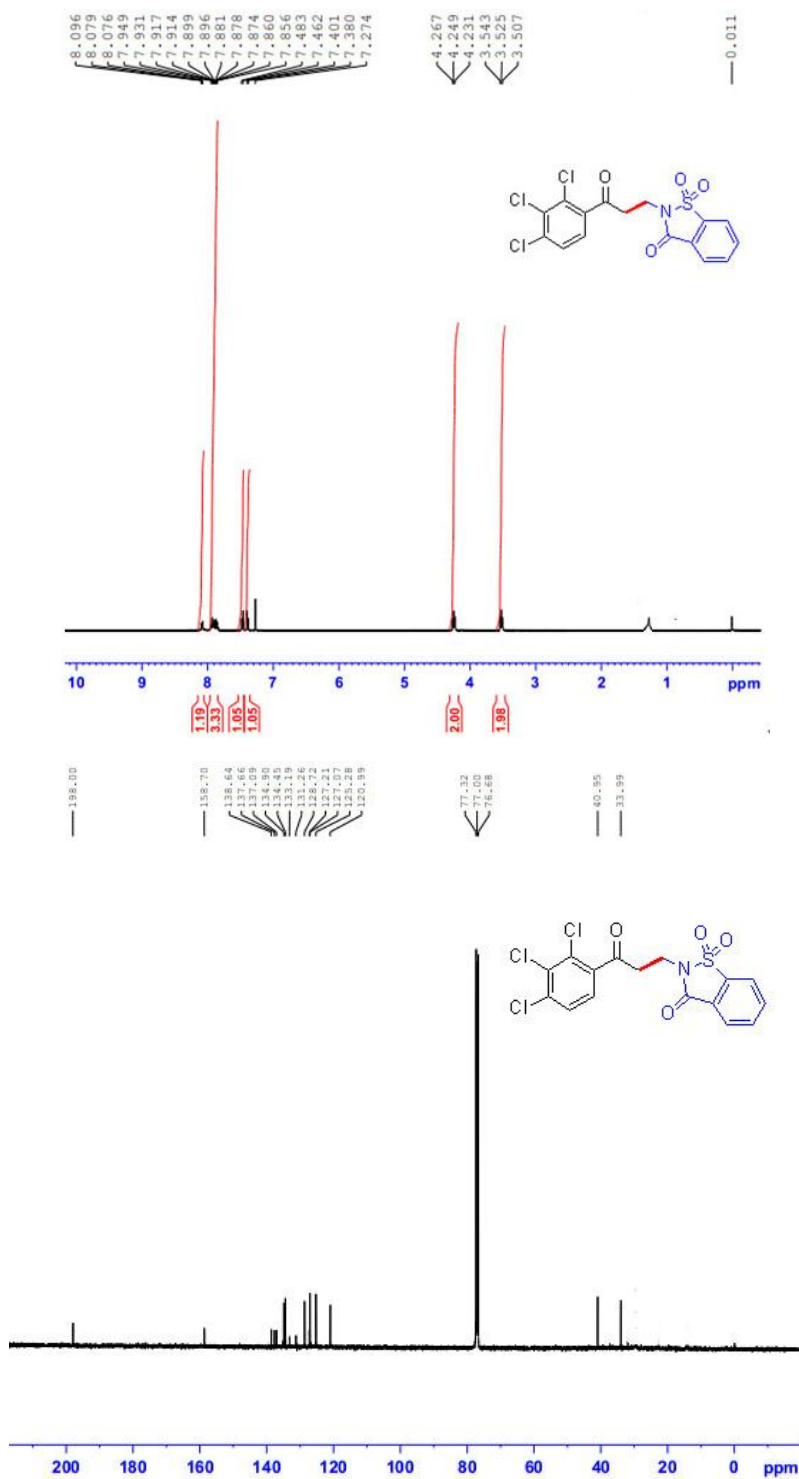



# Compound 2u

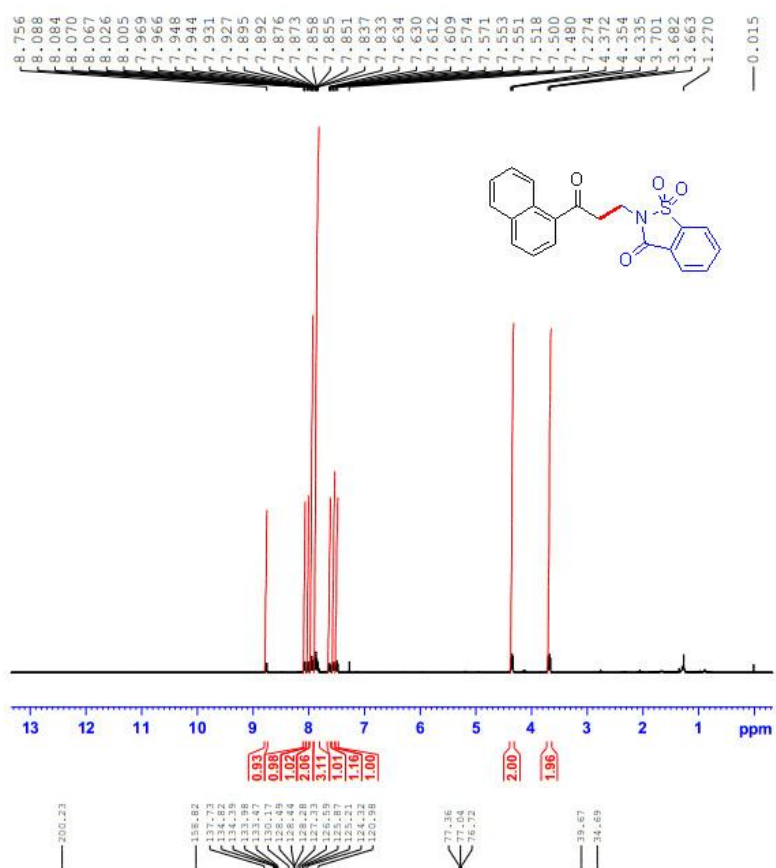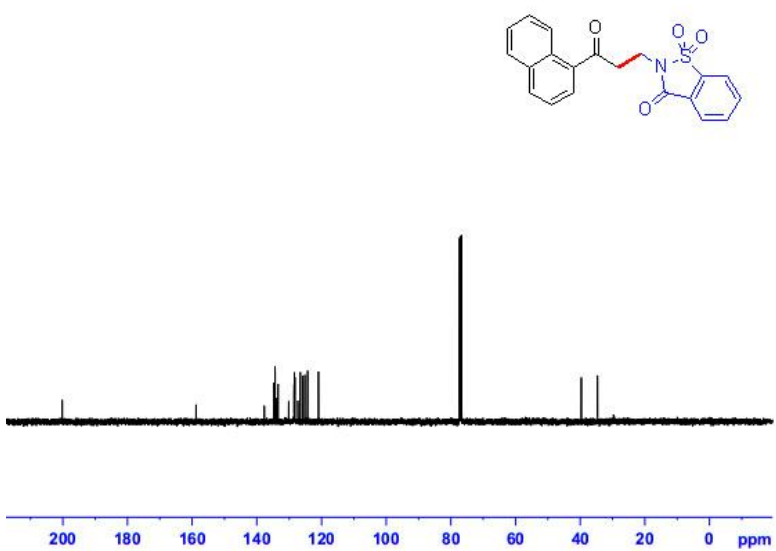

Compound 2v

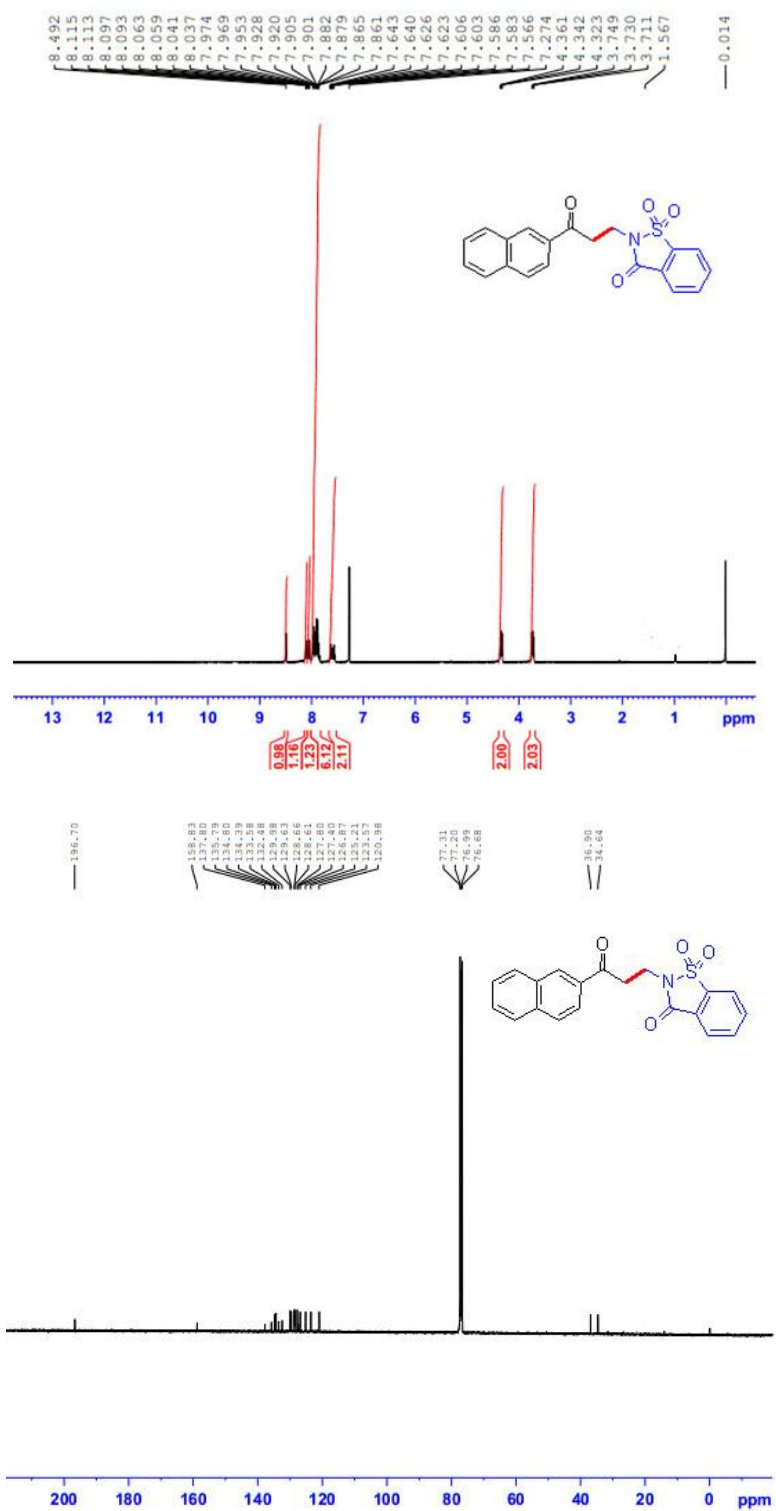

# Compound 2w

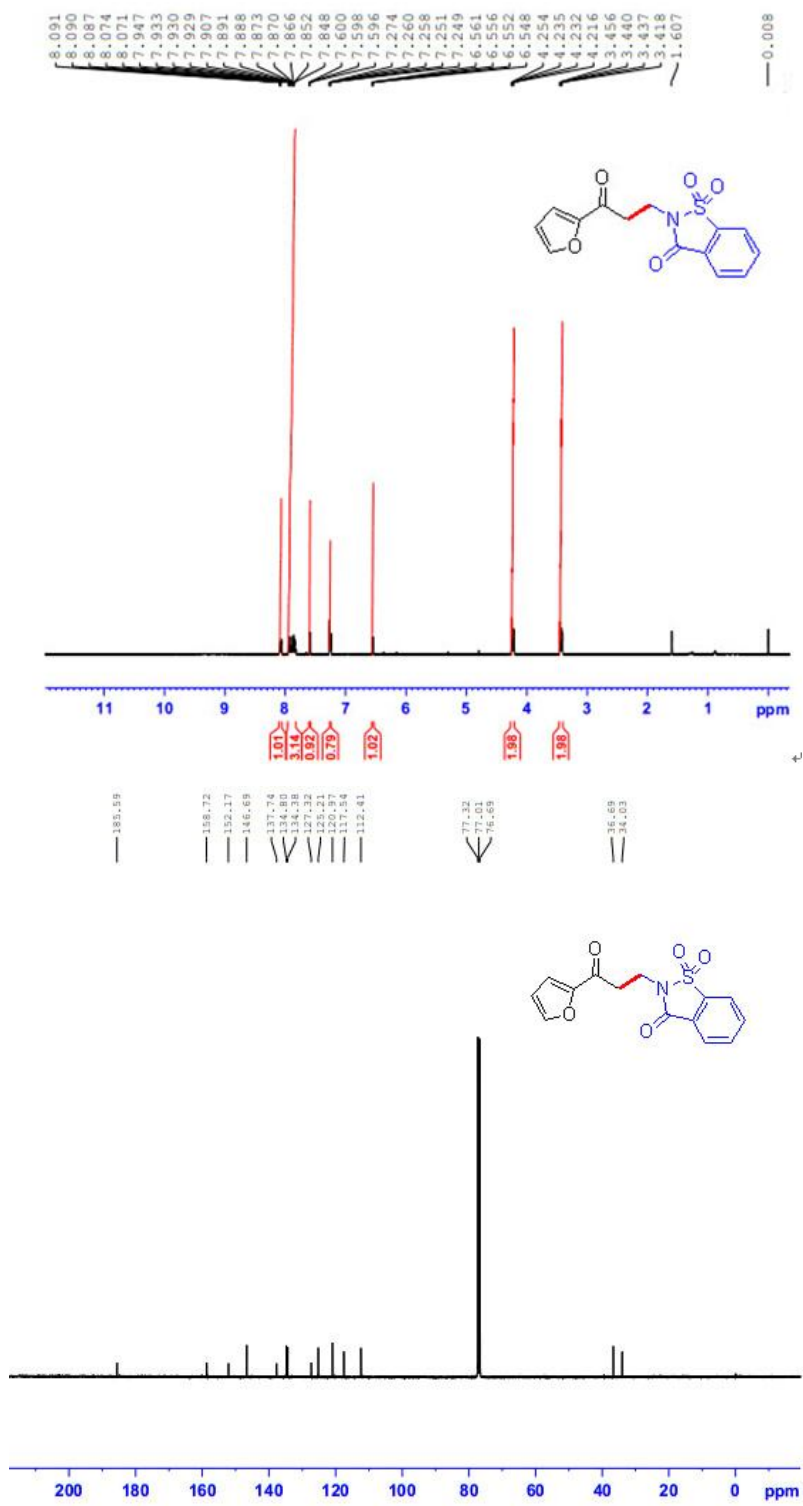

# Compound 4a

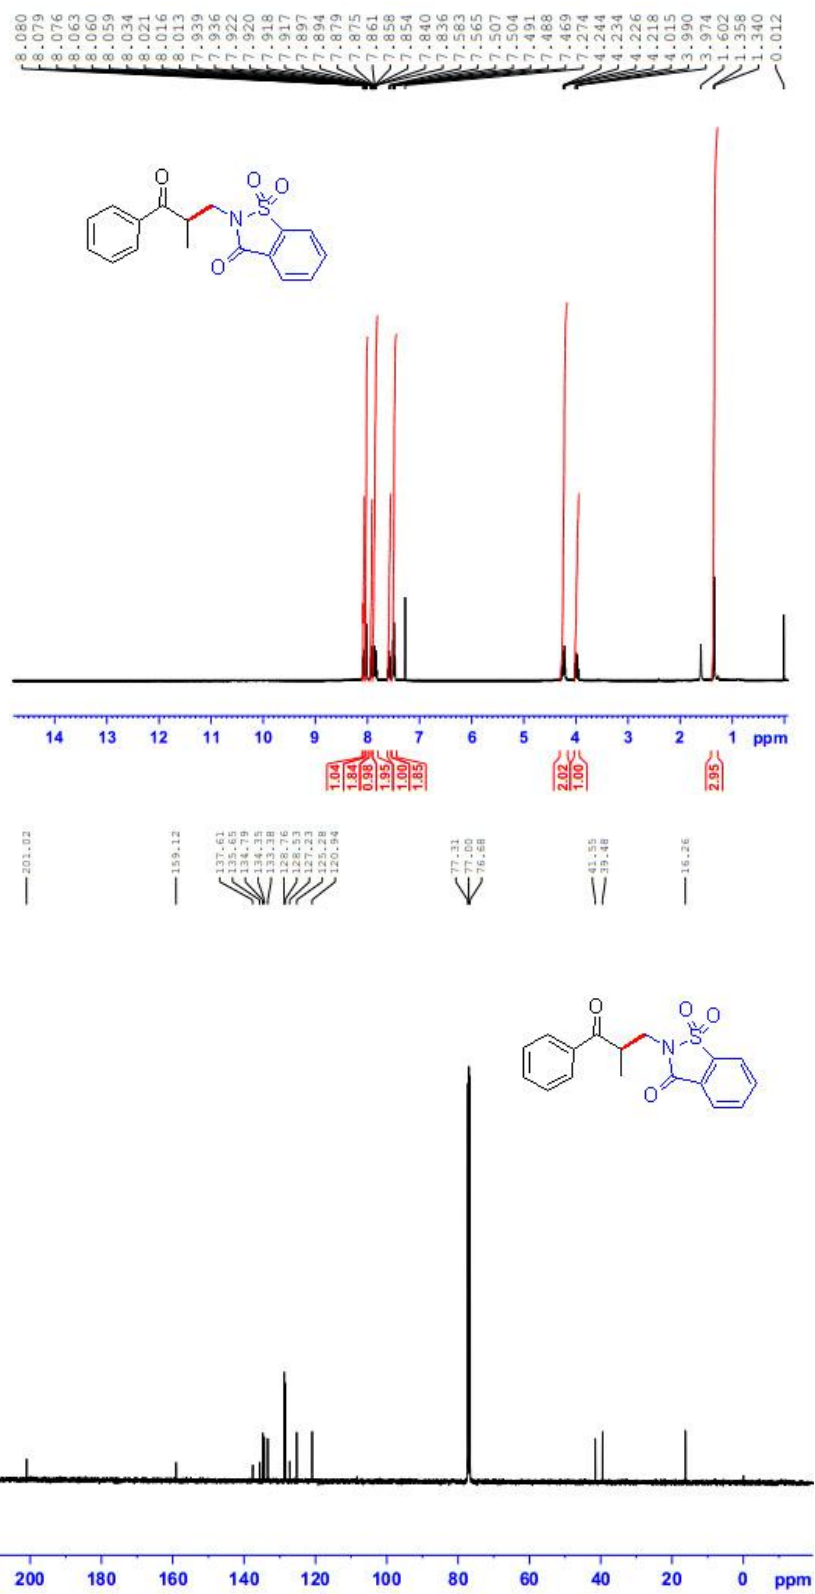

# Compound 4b

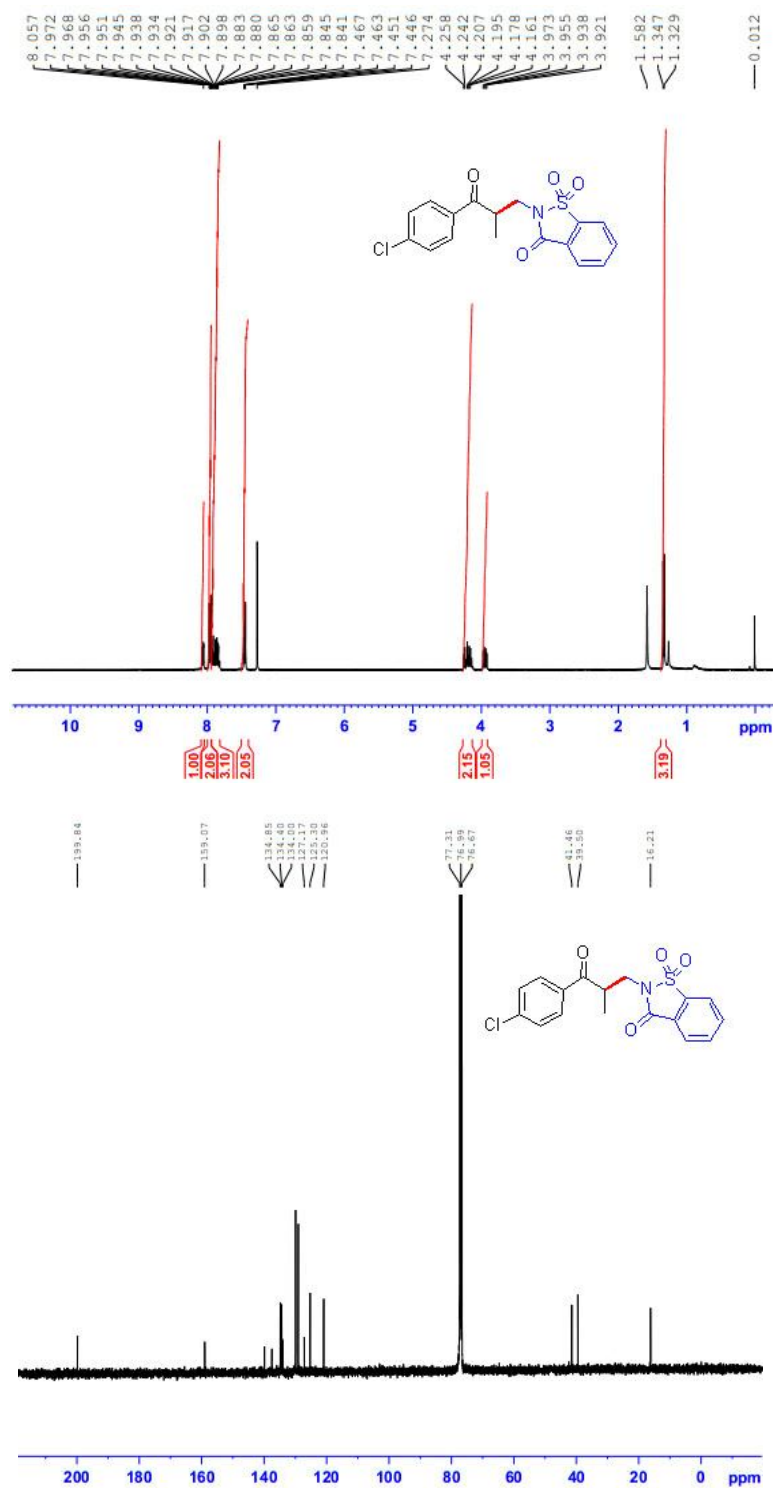

# Compound 4c

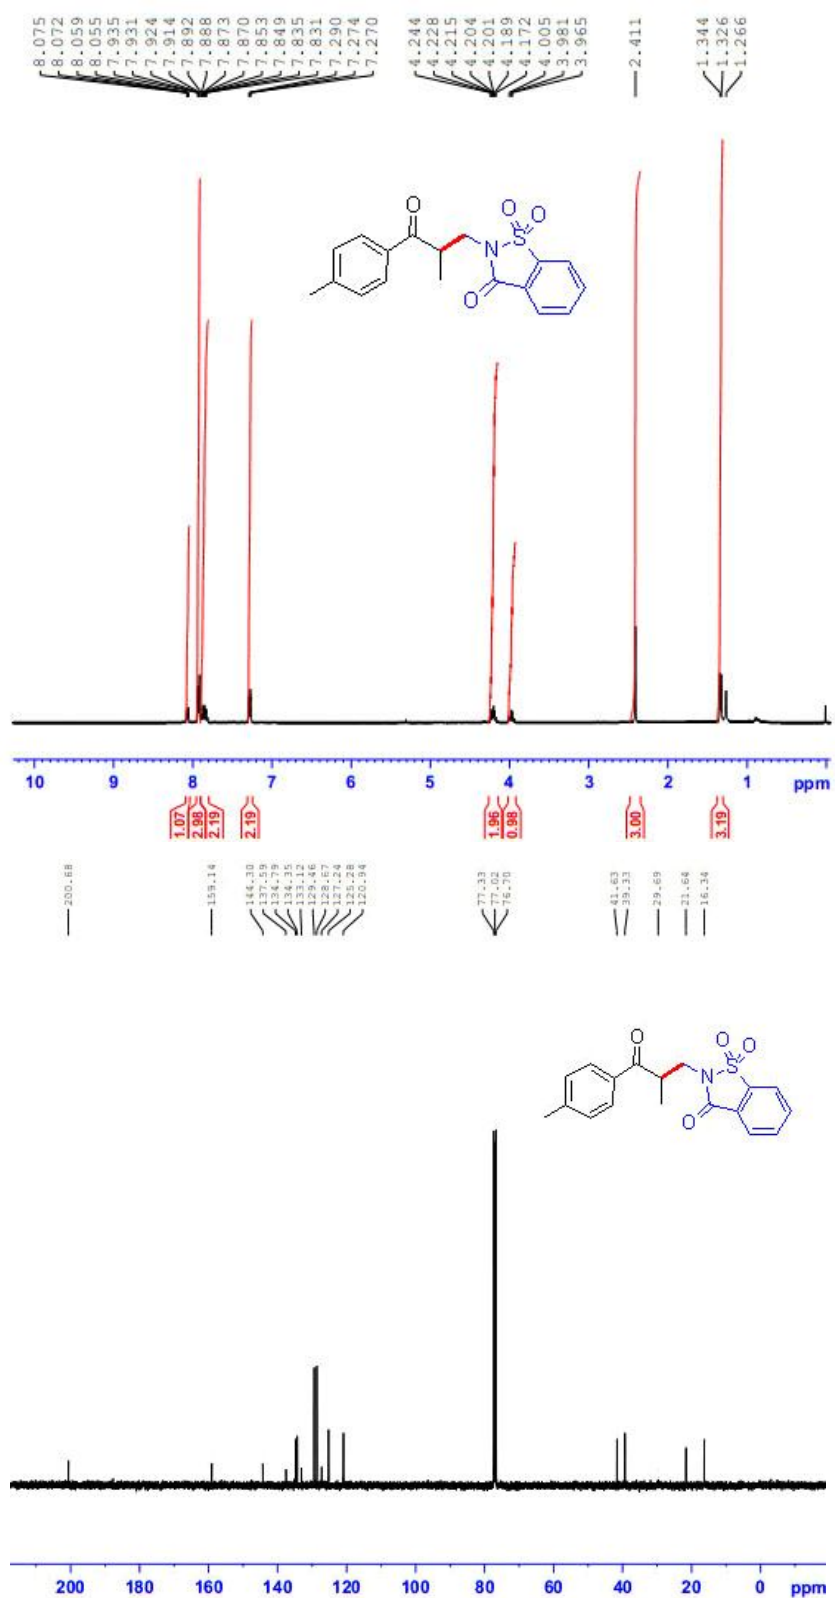

# Compound 4d

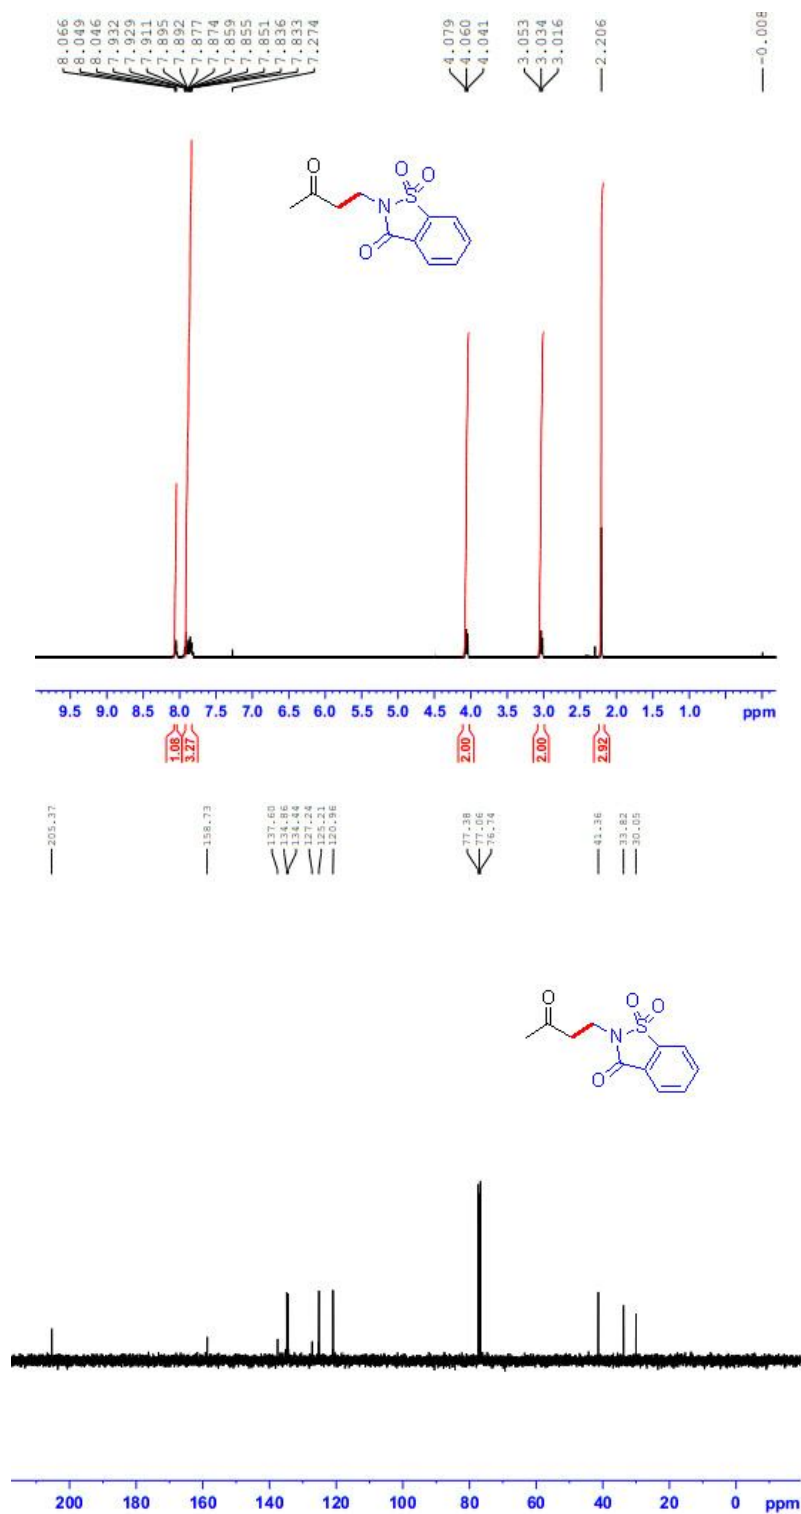

# Compound 4e

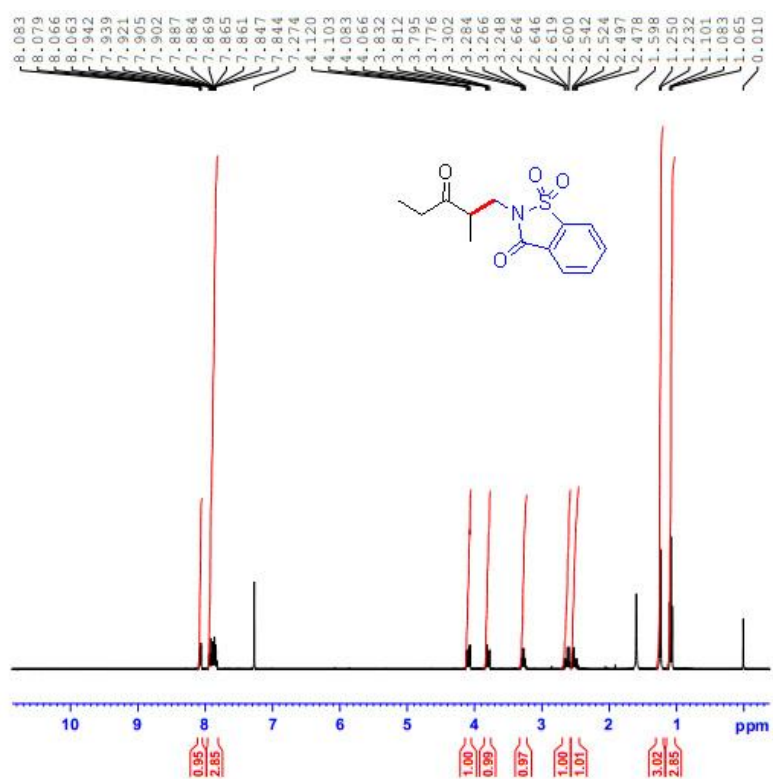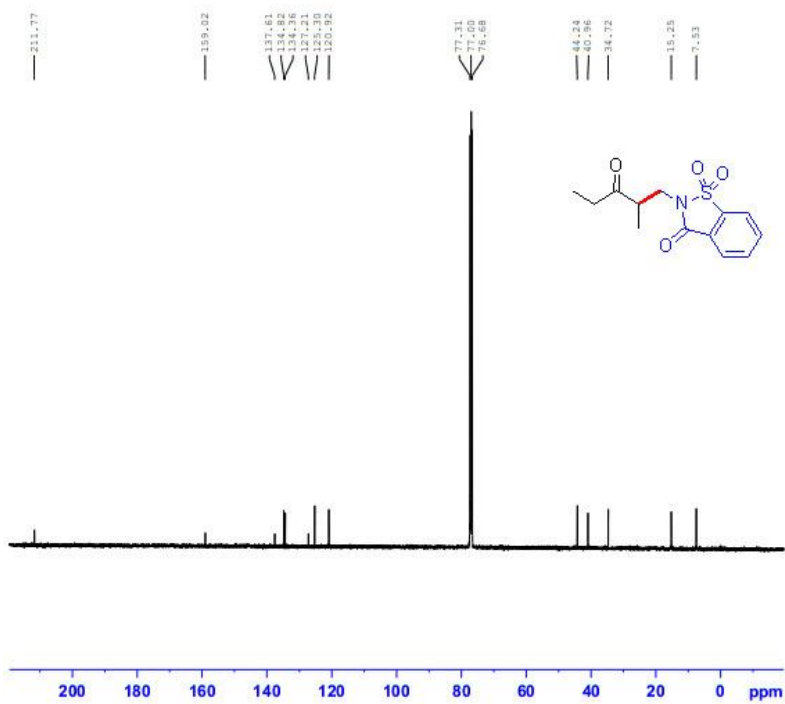



# Compound 4f

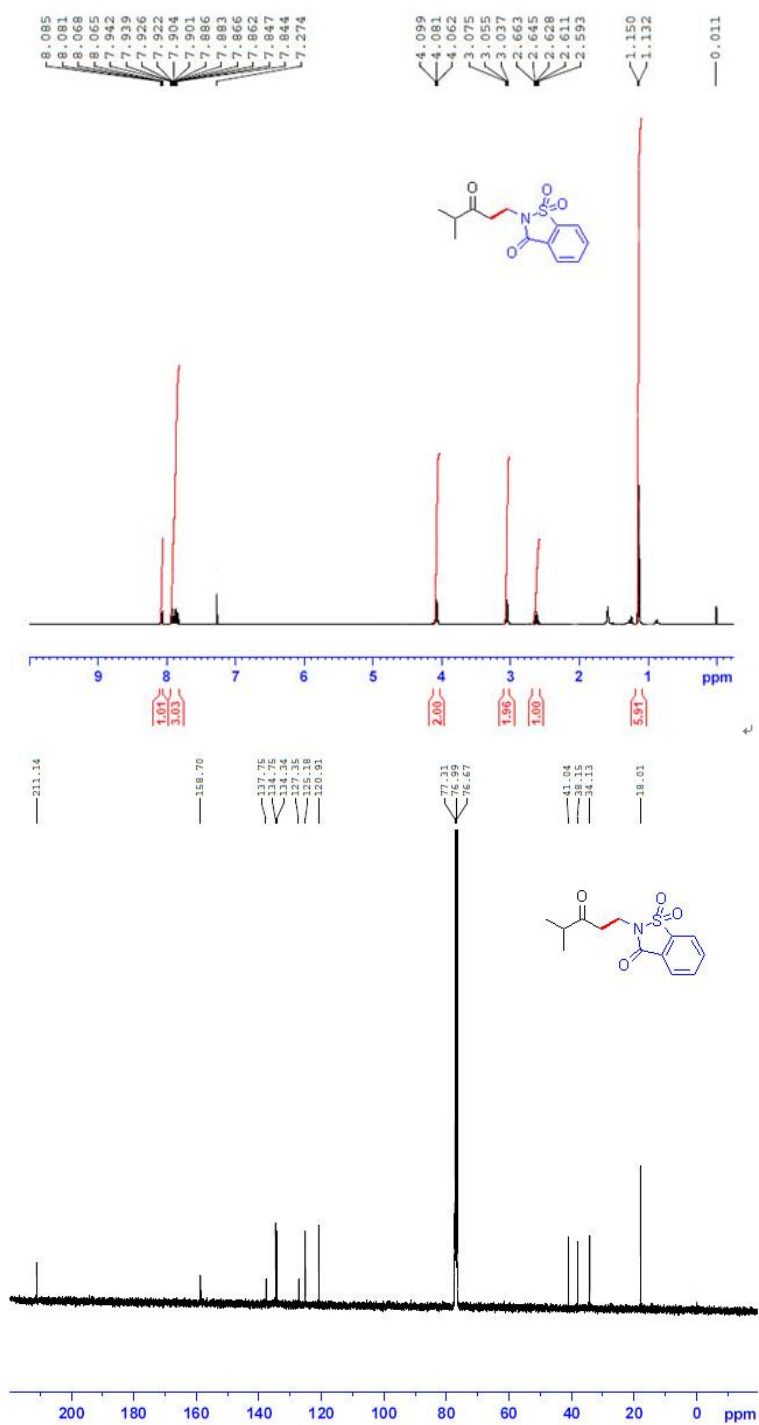

# Compound 4g

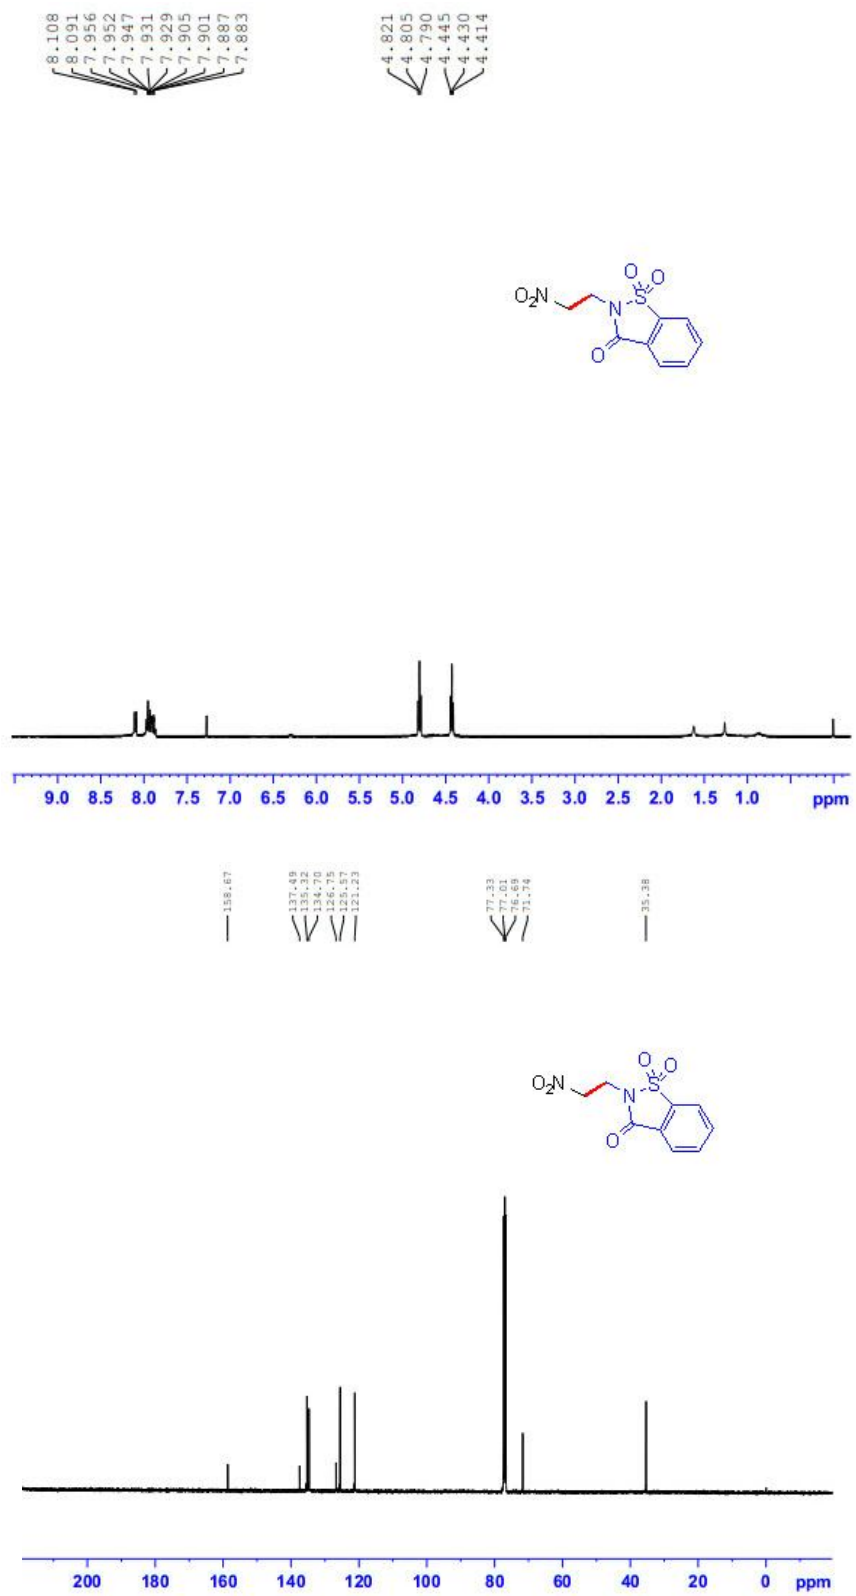

# Compound 4h

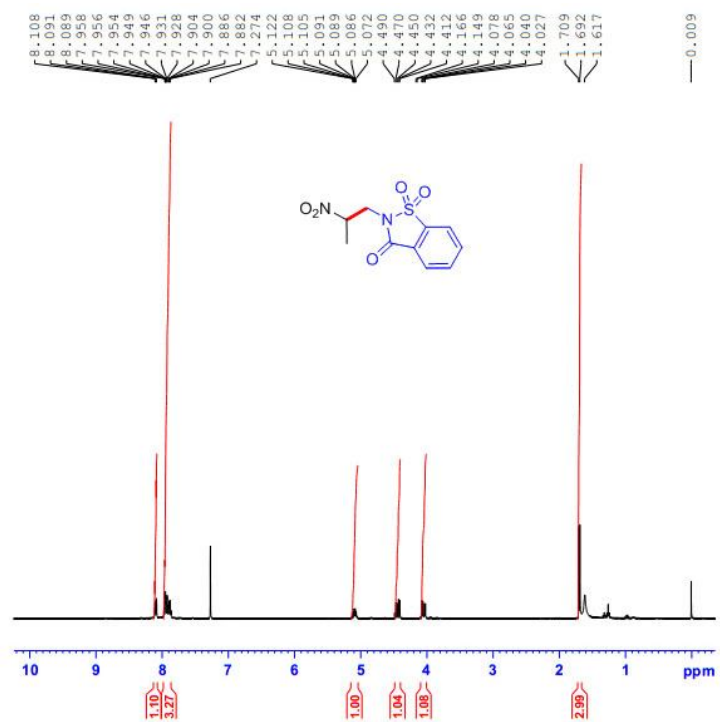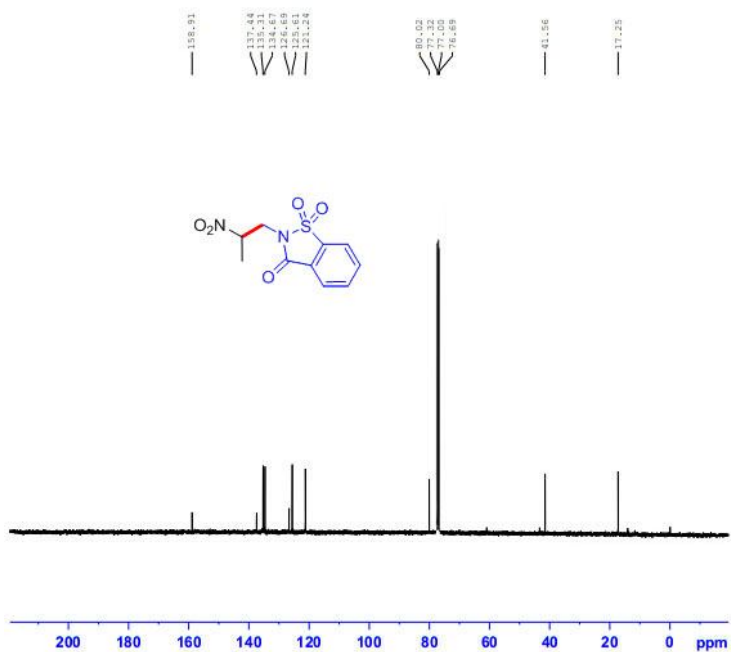

# Compound C

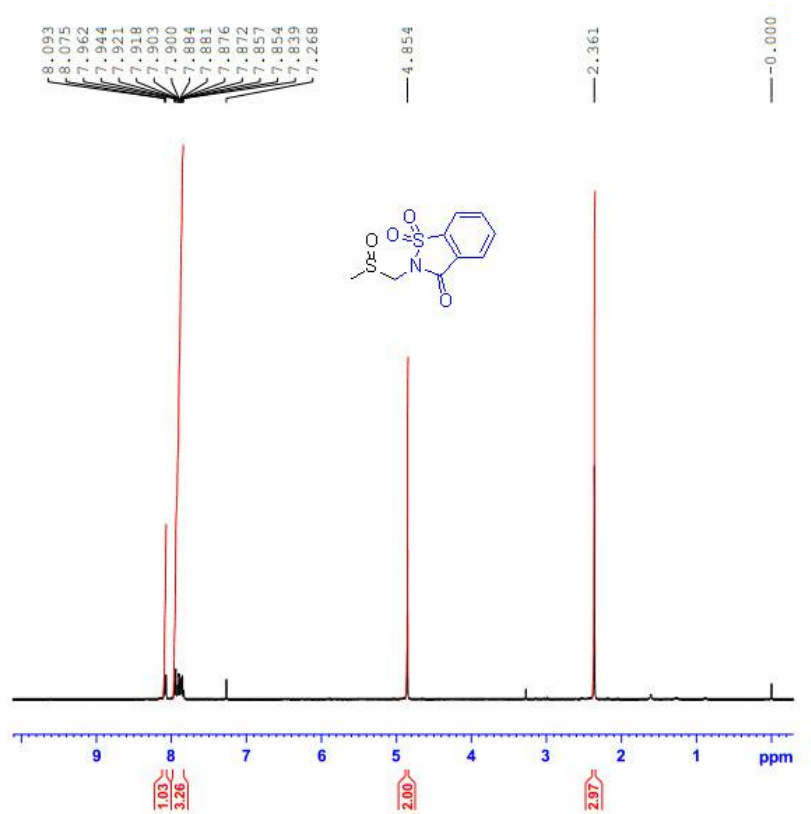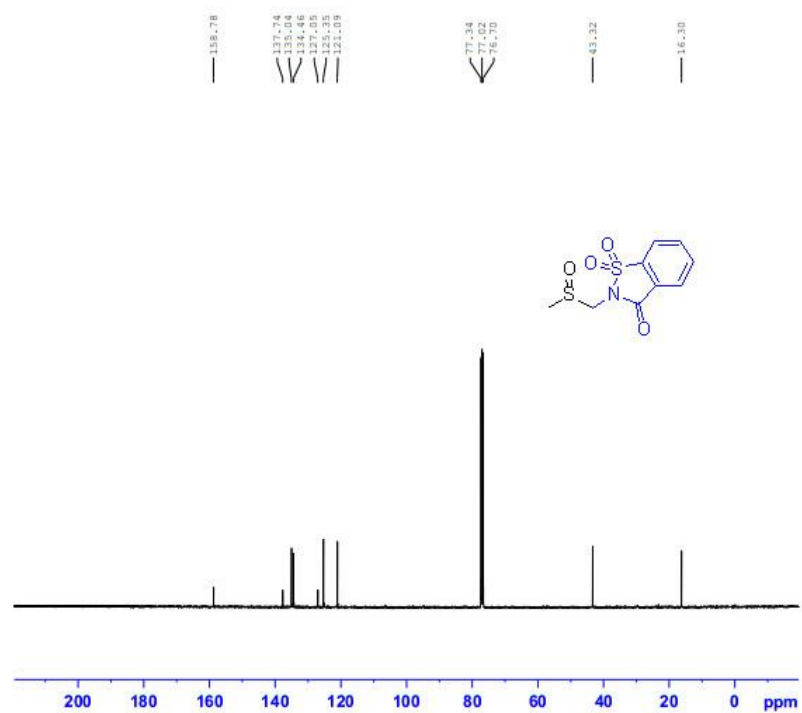

# Compound H

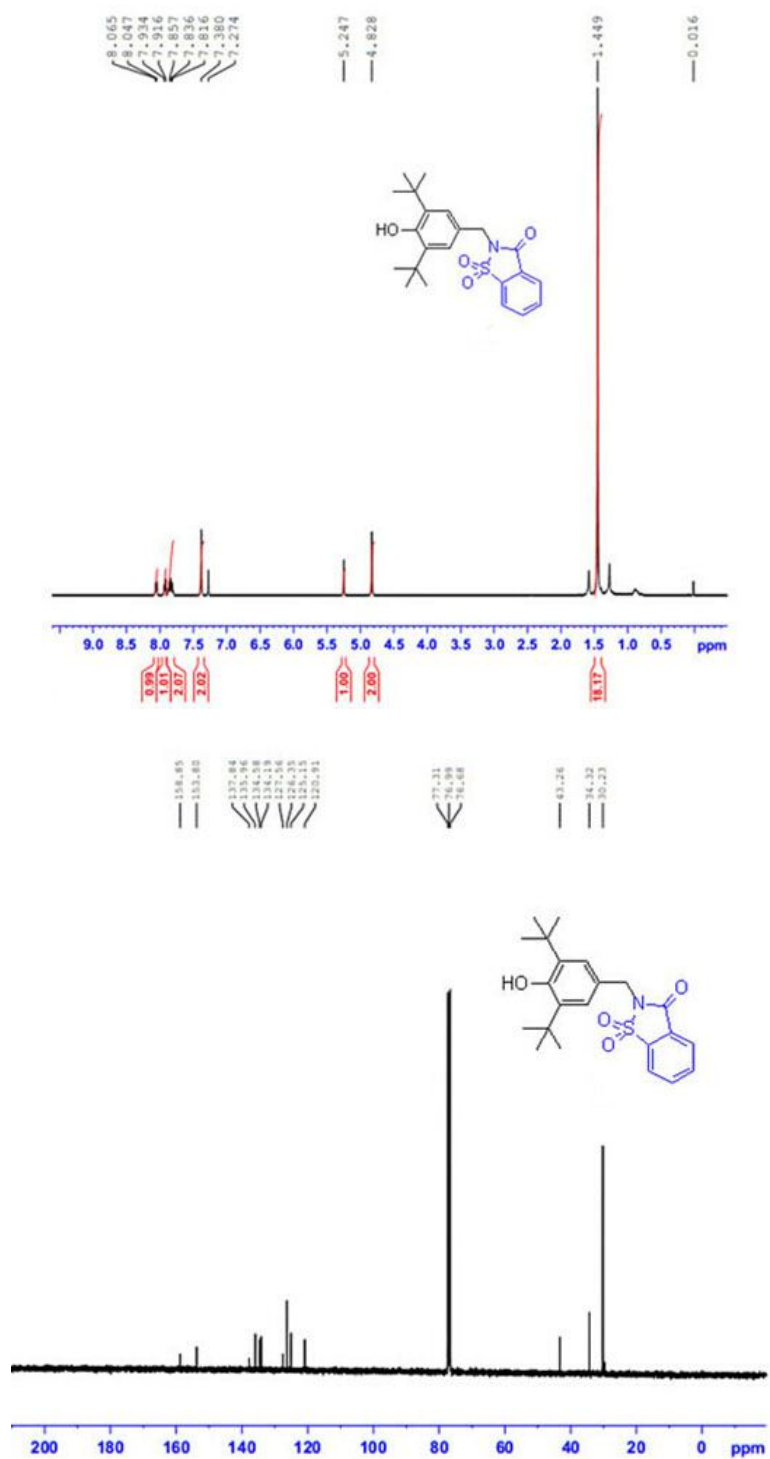

Supplement: c4ra14249g1.pdf [file c4ra14249g1.pdf]
